# 1 Lipid membranes modulate the activity of RNA through sequence-dependent 2 interactions

3

4 **Authors: Tomasz Czerniak<sup>a</sup> and James P Saenz<sup>a\*</sup>**

5 <sup>a</sup> Technische Universität Dresden, B CUBE Center for Molecular Bioengineering, 01307 Dresden,  
6 Germany

7 \*corresponding author and lead contact: james.saenz@tu-dresden.de

8

## 9 **Abstract**

10

11 RNA is a ubiquitous biomolecule that can serve as both catalyst and information carrier. Understanding  
12 how RNA bioactivity is controlled is crucial for elucidating its physiological roles and potential  
13 applications in synthetic biology. Here we show that lipid membranes can act as RNA organization  
14 platforms, introducing a novel mechanism for ribo-regulation. The activity of R3C ribozyme can be  
15 modified by the presence of lipid membranes, with direct RNA-lipid interactions dependent on RNA  
16 nucleotide content, base pairing and length. In particular, the presence of guanine in short RNAs is  
17 crucial for RNA-lipid interactions, and G-quadruplex formation further promotes lipid binding. Lastly,  
18 by artificially modifying the R3C substrate sequence to enhance membrane binding we generated a  
19 lipid-sensitive ribozyme reaction with riboswitch-like behavior. These findings introduce RNA-lipid  
20 interactions as a tool for developing synthetic riboswitches and novel RNA-based lipid biosensors, and  
21 bear significant implications for RNA World scenarios for the origin of life.

22

## 23 **Introduction**

24

25 RNA performs diverse functions ranging from information storage to regulation of other biomolecules  
26 and direct catalysis of biochemical reactions. The functional versatility of RNA has implications for  
27 understanding plausible scenarios for the origin of life<sup>1-3</sup>, and for developing tools in synthetic biology<sup>4-</sup>  
28 <sup>6</sup>. Research aimed at understanding how an RNA World could have emerged has motivated  
29 development of ribozymes with functions including RNA ligation<sup>7-10</sup>, replication<sup>11,12</sup> and other  
30 activities<sup>13-16</sup>. The experimental development of functional RNAs raises the possibility of recapitulating  
31 an RNA World and engineering biochemical systems based on RNA. For both synthetic biology and  
32 understanding the origin of self-replicating organisms, RNA has intrinsic appeal: it can serve functions  
33 of both DNA (information storage) and proteins (enzymes), obviating the need for translation  
34 machineries and protein chaperones. Furthermore, RNAs are more likely than proteins to undergo  
35 some degree of reversible denaturation to a functional conformation, lending robustness against a  
36 broad range of physical and chemical conditions. In order to design a biochemical system based on  
37 RNA, however, it is essential to be able to coordinate RNA activity in space and time.

38

39 Key to harnessing the functional versatility of RNA is understanding how to spatially and temporally  
40 modulate its properties and to selectively modulate the activity of different RNAs within one system.  
41 The physicochemical environment surrounding an RNA molecule is a central determinant of its  
42 structure, stability and activity. Spontaneous RNA hydrolysis and ligation, as well as catalytic RNA  
43 activity are sensitive to pH<sup>17</sup>, ionic strength<sup>18,19</sup> and RNA concentration changes<sup>11</sup>, among other  
44 parameters. Similarly, RNA activity can be modulated by interactions with molecules such as ions,

45 proteins, and other nucleic acids<sup>20</sup>. Thus, one approach to regulating RNA activity could be via tunable  
46 interactions with binding partners that affect RNA structure, concentration or chemical  
47 microenvironment.

48  
49 One mechanism for modulating RNA activity could be through direct RNA-lipid interactions<sup>19,21,22</sup>.  
50 Because of their amphiphilic nature, lipids spontaneously self-assemble into membranous structures  
51 that can encapsulate RNA into protected and selective microcompartments<sup>23–25</sup>. Alternatively, direct  
52 RNA-lipid interactions could localize RNAs to membrane surfaces, increasing its local concentration  
53 and reducing dimensionality for intermolecular interactions<sup>21</sup>. Lastly, localization to a lipid surface  
54 brings RNA into a physicochemically unique microenvironment with sharp gradients of hydrophobicity,  
55 electrical permittivity, and water activity. Through these effects, RNA-lipid interactions could provide  
56 a powerful mechanism for modulating RNA activity.

57  
58 The first functional RNA-lipid interaction was described more than 40 years ago<sup>26</sup>, with subsequent  
59 research revealing various factors that facilitate nucleic acid-lipid binding<sup>27–37</sup>. More recently, specific  
60 RNA sequences have been generated through SELEX with affinity for fluid membranes comprised of  
61 phospholipids and cholesterol<sup>38–40</sup>. Interestingly, mixtures of RNAs have also been shown to bind to  
62 membranes that are in a solid crystalline (gel) phase<sup>41,42</sup>. These studies revealed that, while most  
63 randomized mixtures of RNA sequences can bind to gel membranes, there is a relatively small chemical  
64 space of oligomers that have affinity for fluid membranes. Thus, conceptually, gel membranes could  
65 provide a platform for modulating the activity of a diverse range of RNAs. However, the effects of gel  
66 membranes on RNA activity and the sequence selectivity of such interactions are relatively unexplored.

67  
68 This study reports the effect of lipid membranes on RNA catalytic activity. We show that RNA-lipid  
69 binding depends on the primary sequence, secondary structure, and length of RNA. Using the trans-  
70 acting R3C ligase ribozyme, we observed that R3C-lipid binding changes ribozyme activity in a  
71 concentration-dependent manner. Lipid binding assays show that the interaction of short RNA  
72 sequences with gel membranes depends on guanine content and the presence of double-stranded  
73 structures. Lastly, modification of R3C's substrate sequence increased the tunability of R3C-based  
74 reactions through a lipid-dependent mechanism. Our findings demonstrate that membranes can serve  
75 as platforms for ribo-regulation, which could contribute to the development of RNA-based lipid  
76 biosensors and lipid-sensitive riboswitches. This approach introduces new tools for molecular and  
77 synthetic biology and raises the prospect of previously unrecognized roles for RNA-lipid interactions in  
78 the origin and evolution of life.

79

## 80 **Results**

81 The discovery that RNA can catalyse reactions in addition to encoding information<sup>18,43</sup>, opened new  
82 directions for engineering life and the possibility of protocells emerging from an RNA world<sup>2</sup>. But, a  
83 key missing ingredient for RNA-based systems (e.g. an RNA World or synthetic systems based on RNA  
84 biochemistry) is a mechanism to organize RNAs and regulate their activity. We hypothesized that RNA-  
85 membrane interactions could influence ribozyme activity by changing local RNA concentrations at the  
86 membrane surface or influencing RNA conformations.

87

88 We took advantage of the observation that RNA can interact with solid crystalline (gel) phase  
89 membranes composed of phosphatidylcholine lipids<sup>41,42</sup> to test the hypothesis that lipid membranes  
90 can serve as platforms for ribo-regulation. We first determined the membrane-buffer partition

91 coefficients for a random mixture of RNA oligomers using phosphatidylcholine lipids employed in  
92 previous work<sup>42</sup> that are in a gel phase (DPPC at 24 °C), ripple phase (DMPC at 24 °C), a liquid disordered  
93 ( $L_d$ ) phase (DOPC) and a liquid disordered-liquid ordered ( $L_d-L_o$ ) phase separated system  
94 (DOPC:DPPC:cholesterol, 2:2:1 ratio) (**Fig. 1**). RNA lipid-buffer partition coefficients indicate how well  
95 a particular molecule binds to the membrane by comparing the relative amount of RNA in buffer and  
96 on the lipid membrane<sup>44</sup>. As expected, RNA showed the strongest binding to gel phase membranes  
97 with a greater than 10-fold higher partition coefficient than for fluid membranes. Interestingly RNA  
98 showed slightly higher binding to  $L_d-L_o$  phase separated membranes than to  $L_d$  phase membranes,  
99 consistent with previous observations indicating that RNA can have a higher affinity for membranes in  
100 the more rigid  $L_o$  phase<sup>42</sup>. Surprisingly, RNA bound comparatively well to gel membranes composed of  
101 the saturated fatty acid palmitate, with a partition coefficient falling in between fluid and gel  
102 phosphatidylcholine membranes. Fatty acids are among the simple amphiphiles that could have  
103 accumulated on early Earth<sup>45</sup>. Thus, RNA-lipid interactions can now be extended to a prebiotically  
104 plausible lipid. It is worth noting that most of the RNA oligomers measured in this study had partition  
105 coefficients above  $10^5$ , which is in the range of partition coefficients determined for hydrophobic  
106 peptides<sup>44</sup>. Binding to DPPC membranes remained above  $10^5$  even at physiological concentrations of  
107 Ca and Mg ions (**Suppl. 1a**). These observations allowed us to identify DPPC gel membranes as the  
108 most optimal lipid for this study, based on the superior RNA-lipid binding coefficient for DPPC.  
109

110 To visibly demonstrate the preferential binding of RNA to gel versus fluid membranes, we prepared  
111 giant unilamellar vesicles (GUVs) that are phase separated into gel and liquid domains and observed  
112 the distribution of a random mixture of RNA oligomers stained with SybrGold by fluorescence  
113 microscopy (**Fig. 2a**). A fluorescent lipid probe (DiD) was enriched in membrane liquid domains and  
114 was excluded from gel phase domains, which allowed us to directly observe specific RNA-gel  
115 membrane colocalization in a phase separated system. RNA enrichment on GUV gel domains was  
116 reversed by heating the system above the gel phase melting temperature, resulting in an entirely liquid  
117 phase vesicle (**Fig. 2b**). Binding of RNA oligonucleotides to gel-phase small unilamellar vesicles (SUVs)  
118 can also lead to aggregation into large visible RNA-lipid assemblies<sup>37,41</sup> (**Fig. 3a**), which is probably due  
119 to charge-based interactions (**Suppl. 1c**). Depletion of divalent cations (both Mg and Ca, **Suppl. 1b**) or  
120 increasing temperature above the lipid melting temperature (i.e. producing fluid instead of gel  
121 membranes) reduced RNA-membrane binding and aggregation (**Fig. 3a**)<sup>27,31,41,42</sup>. Taken together,  
122 reversible RNA-lipid binding and lipid-dependent aggregation could provide a tunable mechanism to  
123 concentrate and regulate RNAs in simple bottom-up synthetic systems, or in a prebiotic environment.  
124

### 125 RNA-lipid binding changes the probability of RNA-RNA interactions

126 To determine whether local RNA concentration is influenced by interaction with lipid membranes, we  
127 relied on UV-mediated crosslinking. All small vesicle membranes in this study were composed of DPPC,  
128 which is in a solid crystalline (gel) phase at the experimental temperature of 24°C. Nucleic acid bases  
129 absorb UV light, producing chemical changes that yield base-base covalent bonds in a distance-  
130 dependent manner, yielding insights into the structure and interactions of nucleic acids<sup>46-48</sup>. We first  
131 observed the effect of gel membranes on the crosslinking of a single defined RNA sequence, the R3C  
132 ligase, which predominately forms one structure (**Fig. 3b, upper native gel**). In subsequent  
133 experiments, we focus on the R3C ligase, since it is a relatively short single turnover ribozyme with a  
134 simple structure and a prebiotically interesting ligation activity (**Suppl. table 1**)<sup>10</sup>. When subjected to  
135 UV, the R3C ligase shows slightly increased crosslinking in the presence of low lipid concentrations. A  
136 further increase in lipid concentration led to decreased crosslinking efficiency, possibly through

137 dilution of the RNA species on the surface of the lipid membranes. This effect was inversely correlated  
138 with RNA-lipid binding efficiency (**Fig. 3b**). In contrast, a mixture of RNA oligomers with randomized  
139 sequences which can form a more diverse range of inter- and intra-molecular structures (**Fig. 3b,**  
140 **bottom native gel**) showed continuously increasing and overall higher UV-crosslinking efficiency in the  
141 presence of lipids (**Fig. 3b, bottom graph**). These results show that RNA-gel membrane binding can  
142 influence the local concentration of RNAs in very different ways depending on the type of RNA.

143  
144 The contrasting effect of crosslinking for R3C and randomized oligomers suggested that gel membrane  
145 binding can enhance RNA-RNA interactions for RNAs with a higher propensity for intermolecular  
146 interactions. Indeed, we observed that a mixture of two oligomers with complementary sequences  
147 showed enhanced crosslinking relative to a single oligo with lower propensity for inter- and  
148 intramolecular interactions (**Fig. 3c**). At higher lipid:RNA ratios two things happen: a larger fraction of  
149 the total RNA becomes bound to the membrane, and available membrane surface area increases  
150 thereby diluting the lateral density of RNAs on the membrane. Increased RNA crosslinking for  
151 randomized oligomers at higher lipid:RNA ratios is therefore most probably influenced by an enhancing  
152 effect of membrane binding on RNA-RNA interactions, which becomes more prominent as a larger  
153 fraction of the total RNA is bound to the membrane surface. Thus, RNA-membrane interactions can  
154 influence RNA-RNA interactions in a manner that is dependent on lipid concentration and RNA  
155 sequence diversity. This further suggests that membrane binding could have an effect on trans-acting  
156 ribozyme activity derived from base pairing (**Suppl. table 1**).

157

#### 158 **RNA-lipid interactions influence RNA catalytic activity**

159 To investigate the functional consequence of RNA-lipid binding, we tested the effect of lipids on the  
160 activity of the trans-acting R3C ligase ribozyme. R3C ligase is a ribozyme that catalyzes ligation of  
161 substrate strands to the ribozyme (**Fig. 4a**)<sup>10</sup>. Since R3C is also part of an RNA self-replication system,  
162 the effects of lipids on R3C are also interesting with regard to the emergence, evolution and artificial  
163 synthesis of autonomous self-replicating systems<sup>11,12</sup>. The R3C reaction rate in the absence of  
164 membranes was 11 pM/min, with a reaction constant rate of  $k = 6.4 \times 10^{-4} \text{ min}^{-1}$ . Addition of lipid  
165 vesicles led to an increased reaction rate (14 pM/min, +29%), which could plausibly be due to increased  
166 ligase-substrate interaction on the membrane either through increased concentrations at the  
167 membrane surface or through enhanced exposure of the substrate-binding domain of R3C. At the  
168 highest lipid concentration, the reaction rate dropped to 8 pM/min (-27%) (**Fig. 4b**). A decrease in  
169 reaction rate was correlated with further R3C ligase binding to the lipid membranes (>100 lipid/R3C,  
170 **Fig. 3b**). We speculate that this may be caused by dilution of RNA on the membrane as the available  
171 membrane surface area increases at higher lipid:RNA ratios. Alternatively, if preferential membrane  
172 binding of either R3C or its substrate occurs, then aggregation of lipid vesicles could selectively  
173 sequester RNA within vesicle aggregates reducing interactions of the ribozyme with its substrate.  
174 Importantly, we did not observe enhanced activity relative to the vesicle-free reaction in the presence  
175 of fluid membranes composed of DOPC, or gel membranes in the absence of Ca ions (**Suppl. 3**), both  
176 conditions in which RNA-lipid binding is impaired. Thus, despite the relatively small effect on activity,  
177 these results provide the proof of principle that RNA-gel membrane binding can enhance the reaction  
178 rate of a trans-acting ribozyme in a lipid concentration-dependent manner.

179

#### 180 **R3C ligase and its substrate bind differently to the membrane**

181 To further understand if preferential membrane binding of either R3C or its substrate contributes to  
182 changes in ligation rates, we analyzed lipid-binding affinities of the ligase and its substrate. The

183 partition coefficient of the short 12 nt substrate was more than 3 orders of magnitude lower than that  
184 of the 84 nt R3C ligase (**Fig. 4c**). Thus, in this system, substrate-membrane binding is essentially  
185 negligible compared with R3C-membrane binding, and this could partly explain why we observed such  
186 a small (~30%) enhancement in R3C ligation activity. The negligible substrate binding suggests that  
187 enhanced activity could be due to an effect of R3C-lipid interaction on the ligase-substrate complex,  
188 consistent with our observation that the probability of RNA-RNA interactions can be enhanced through  
189 RNA-lipid binding (**Fig. 3c**). Alternatively, enhanced activity could be derived from interactions of the  
190 substrate with the membrane after it has bound to R3C. Such a large difference in binding was  
191 surprising since we had begun this study with the assumption based on previous observations that  
192 RNA-gel membrane binding is far less selective than for RNA-fluid membrane binding<sup>42</sup>. The most  
193 prominent differences between R3C and its substrate are length and nucleotide composition (**Fig. 4c**),  
194 and this prompted us to explore which features of RNA could influence binding to gel membranes.

195

### 196 **RNA sequence influences binding to gel membranes**

197 Understanding the features that influence RNA-lipid interactions could allow us to engineer RNAs with  
198 higher membrane affinity, and thereby enhance activity by concentrating RNAs at the membrane  
199 surface. The interaction of RNA with fluid membranes has been shown to be very specific to sequence  
200 and structure<sup>38-40</sup>. In contrast, interactions of RNA with gel-phase membranes have been previously  
201 shown to exhibit low sequence-dependence, based on binding of oligomers with various RNA  
202 sequences<sup>41,42</sup>. However, the large difference in binding for R3C and its substrate suggests that RNA-  
203 gel membrane interactions might in fact be dependent on RNA composition or structure.

204

205 To investigate which features of RNA influence its interaction with lipid membranes we first evaluated  
206 how base content influences membrane binding of short RNA species. 19 nt oligomers with only one  
207 type of nucleotide were tested together with a random sequence as a control. Remarkably, whereas  
208 the 19xG oligomer bound very efficiently to the gel-phase membrane (partition coefficient  $>1 \times 10^6$ ),  
209 oligomers of A, C or U showed practically no binding. A mixture of 19 nt RNA with randomized  
210 sequences showed moderate binding, as did one with AG-repeats (**Fig. 5a**), most probably due to the  
211 introduction of guanine. While the formation of structures through non-canonical A-G pairing<sup>49-51</sup>  
212 could potentially influence binding, migration of the AG-repeat oligomer as a single band on non-  
213 denaturing gel argues against that possibility (**Fig. 7b**). Enhanced binding of an oligomer with only AG-  
214 repeats, therefore, suggests that membrane binding can be influenced by direct guanosine-membrane  
215 interactions<sup>52</sup>. In general, guanine could conceivably enhance binding either through direct  
216 interactions with the membrane, or alternatively by promoting G≡C base pairing or presence of G-  
217 quadruplexes, thereby influencing structure.

218

219 We next examined the effect of deleting a specific base from mixtures of 40 nt oligomers with  
220 randomized sequences. The depletion of G led to the largest decrease in binding, followed by an  
221 intermediate decrease in binding from depletion of A and C, and the smallest decrease in binding from  
222 depletion of U. The decrease in binding affinity in all of the base-depleted oligomers (**Fig. 5b**) indicates  
223 that base-pairing may influence membrane binding. However, the larger effect of G depletion than C  
224 depletion indicates that base pairing is not the only factor responsible for membrane binding,  
225 consistent with our previous observation that G-content alone can influence binding (**Fig. 5a**). The  
226 depletion of A also generates a larger effect than U depletion, suggesting that other factors such as  
227 non-canonical base pairing could play a role. Finally, by comparing 19 nt and 40 nt randomized



228 oligomers, we observed that increasing RNA length also led to enhanced binding, possibly due to  
229 increased length and G content (**Fig. 5a, b**).

230

231 To further determine how guanine content affects membrane binding, we measured lipid-buffer  
232 partition coefficients for short oligomers with varying G-content. Remarkably, addition of two G's per  
233 oligomer led to a two-fold increase of the partition coefficient relative to guanine-depleted RNA.  
234 Oligomers with four and more guanine residues showed a plateau of partition coefficient values (**Fig.**  
235 **5c**). The saturable effect of increasing G-content indicates that binding is not solely due to cumulative  
236 guanine-lipid interactions, but also to other attributes related to G-content, such as base pairing-  
237 derived structures. Analysis by non-denaturing gel shows that a second band appears with the  
238 introduction of G, and that its relative intensity correlates with binding (**Fig. 5c**), suggesting that the  
239 formation of G-dependent intra- or intermolecular structures influences RNA-lipid interactions.  
240 Indeed, tuning the distribution and spacing of G in oligomers with fixed 2xG content resulted in varying  
241 binding that was also correlated with the appearance of a second band on non-denaturing gel (**Suppl.**  
242 **4**). These results indicate that G-dependent structures influence RNA-lipid binding and that even low  
243 guanine content can significantly increase membrane binding efficiency (**Fig. 5c**).

244

#### 245 **RNA-membrane binding is dependent on RNA base pairing**

246 The effect of base depletion on oligomer binding suggested that base-pairing may be a key factor in  
247 membrane binding. To investigate the effect of base-pairing on membrane interactions, we estimated  
248 binding efficiency for 36 nt ssRNA and dsRNA (composed of complementary CAGU and ACUG repeats).  
249 We observed that not only was the membrane binding efficiency higher for dsRNA compared with  
250 ssRNA species, but also that only dsRNA promoted vesicle aggregation (**Fig. 6a**). Binding of dsRNA with  
251 a non-repetitive sequence was also relatively high (partition coefficient of  $4 \times 10^6$ , **Suppl. 5**), controlling  
252 for the possibility that higher binding of dsRNA was due to longer intermolecular linkages formed by  
253 staggering of repeated complimentary ACUG/CAGU strands. We further observed that dsRNA interacts  
254 with fewer lipids than ssRNA, implying different models of binding (**Fig. 6b**). Thus, membrane binding  
255 efficiency can be dependent on the propensity of an RNA molecule to form intra- or inter-molecular  
256 structures through base pairing. Since base pairing is a fundamental element of RNA secondary  
257 structure, our results indicate that structure in general can influence the selectivity of RNA-lipid  
258 interactions.

259

#### 260 **RNA G-quadruplex structures bind well to both gel and fluid membranes**

261 The correlation between G content and enhanced membrane binding pointed towards a potential role  
262 for G-dependent RNA structures. G-rich RNAs can form structures known as G-quadruplexes, in which  
263 G-G interactions lead to the formation of stacked G-tetrads<sup>53</sup>. We therefore examined whether G-  
264 quadruplex formation enhances RNA-lipid interactions. To do this, we synthesized a G-quadruplex  
265 forming RNA with 7-deaza-guanine instead of guanine to inhibit G-quadruplex formation<sup>54</sup>. The  
266 guanine containing oligomer showed almost 2-fold higher binding coefficient than the 7-deaza-  
267 guanine containing oligomer. Although G-quadruplexes can exist in the presence of divalent ions<sup>55</sup>,  
268 they are most effectively stabilized by potassium ions, which was absent from the buffer. However,  
269 salts composed of monovalent ions like KCl can inhibit RNA-lipid binding<sup>41,42</sup>. Consequently, addition  
270 of potassium ions to the buffer led to an overall decrease in binding, but the relative difference in  
271 binding between guanine- and 7-deaza-guanine-containing oligomers was increased to almost 3-fold,  
272 demonstrating that G-quadruplex formation enhances gel membrane binding (**Fig. 6c**).

273

274 Since G-quadruplexes are physiologically relevant structures with diverse roles in cellular regulation<sup>56</sup>,  
275 we asked whether they might also show enhanced binding to fluid physiologically relevant  
276 membranes. Much to our surprise, the partition coefficient for our G-quadruplex oligomer for fluid  
277 membranes composed of DOPC was within the same range as partition coefficient measured for gel  
278 membranes (**Fig. 6c**).

279

### 280 **Modifying R3C substrate sequence enhances membrane binding and modifies reaction rates**

281 In previous experiments, we observed that the binding affinity of the short substrate was >3 orders of  
282 magnitude lower than for the R3C ligase and that reaction rates correlated with R3C-membrane  
283 binding (**Fig. 4b, c**). We therefore reasoned that by modifying the R3C ligase substrate to enhance  
284 membrane binding, we might be able to further modulate ligase activity through increased RNA  
285 density at the membrane surface. Having determined that guanine content is a key factor influencing  
286 RNA-lipid binding (**Fig. 5**), we modified the R3C substrate sequence to increase lipid membrane binding  
287 efficiency by addition of a 5'-overhang with varying amounts of AG repeats (**Fig. 7a**).

288

289 We first assessed the effect of modifying the R3C ligase substrate on ligation rate in the absence of  
290 membranes (**Fig. 7a**). We observed that increasing the guanine content decreased ligase activity,  
291 suggesting that 5' modification of the substrate was inhibiting the reaction either through steric  
292 hindrance or promotion of inhibitory inter- or intra-molecular interactions. To determine whether AG-  
293 rich substrates form intra-molecular structures or exhibit reduced binding with the R3C ligase, we  
294 performed electrophoresis in native conditions with and without ligase (**Fig. 7b**). Firstly, the non-  
295 modified short substrate migrated as one band and was fully bound to the R3C ligase. Secondly, a  
296 4x(AG) 20 nt substrate variant migrated as two bands, which suggests that part of the substrate  
297 molecules have some folding that might bias binding to the R3C ligase. In the presence of ligase,  $20 \pm$   
298  $4.7\%$  of the substrate was non-bound, which correlated with a 22% reduction in reaction rate. For the  
299 longest substrate variant (31 nt), electrophoretic mobility suggested higher folding, since only one  
300 band was present and migrated half-way between the non-folded 12 nt and 20 nt substrates.  $53 \pm$   
301  $8.3\%$  of the 9x(AG) substrate was not bound to the ligase, which correlates with a reduced R3C reaction  
302 rate. Lastly, a free AG-rich 19 nt oligomer did not co-migrate with the R3C ligase, indicating that the  
303 inhibition effect is not based on interactions between the G-containing substrate overhangs and the  
304 ligase (**Fig. 7b**). We further observed that 5' modification of the substrate with a G-depleted  
305 randomized 19 nt overhang had an insignificant effect on R3C activity, and modification with a 2xG  
306 randomized 19 nt overhang produced a relatively small effect (**Suppl. 6**). Therefore, increasing guanine  
307 content reduces R3C ligase-substrate binding, likely accounting for decreased activity.

308

309 We next investigated whether varying guanine content through 5' modification of the substrate  
310 influences membrane binding and, consequently, ligation activity in the presence of membranes. As  
311 expected, the longer guanine-containing R3C substrates showed significantly higher membrane  
312 binding compared with the shorter variant (**Fig. 7c**). To determine whether binding of the substrates  
313 to the membrane enhances ligase activity, we determined R3C reaction rates in the presence of the  
314 gel lipid membranes (**Fig. 7d**). For modified substrates, the reaction rates increased significantly to the  
315 level of the unmodified substrate. Interestingly, none of the modified substrates exhibited higher  
316 activity than the unmodified substrate, indicating that the rescue of activity of the other guanine  
317 variants is not due to increased substrate-ligase interactions through enhanced binding to the  
318 membrane, but rather due to interaction of the membrane with 5' overhangs. We confirmed that the  
319 effect on activity is due to membrane-substrate overhang interactions by showing a rescue of ligation

320 activity upon the addition of an oligomer with a complimentary sequence to the 5' substrate  
321 modifications (**Fig. 7e**). Thus, substrate-membrane interaction increases activity by rescuing the  
322 inhibitory effect of the guanine-rich 5' overhangs (**Fig. 7e, f**).

323  
324 In summary, by modifying the R3C ribozyme substrate with an additional short sequence containing  
325 guanine residues, we increased membrane affinity. We had originally hypothesized that enhancing  
326 substrate-membrane binding would increase ligation activity by concentrating R3C and its substrate at  
327 the membrane surface. The addition of guanines to the substrate, however, introduced an inhibitory  
328 effect on ligation activity that was unexpectedly reversed through the introduction of gel-membranes  
329 to the reaction. While we did not achieve the intended outcome of enhancing activity, we revealed a  
330 lipid-dependent allosteric mechanism for tuning ribozyme activity. These observations raise the  
331 possibility that ribozyme activity could have been modulated through lipid-RNA interactions in an RNA  
332 World, and provide the proof-of-principle for engineering lipid-sensitive riboswitches with a larger  
333 dynamic range for synthetic biology.

334

## 335 **Discussion**

336 Lipids can spontaneously self-assemble to form membranous bilayers, theoretically providing a surface  
337 that can concentrate, protect, and regulate RNAs. Here we demonstrate that RNA-gel membrane  
338 interactions are dependent on nucleotide content and base pairing, providing a means to engineer  
339 RNAs with varying membrane affinities. Increasing the guanine content of the R3C substrate was  
340 sufficient to enhance its binding affinity to gel membranes and revealed that ribozyme activity can be  
341 regulated in an allosteric lipid-dependent manner. This study yields a framework for engineering RNA-  
342 lipid systems that can be regulated based on sequence specificity, and introduces a novel mechanism  
343 for riboregulation in cellular and synthetic systems.

344

345 Our finding that guanine is a key factor in promoting RNA-gel membrane partitioning is consistent with  
346 previous work indicating that guanine residues might play a role in the binding of RNA aptamers to  
347 fluid membranes<sup>38</sup> and that free guanine binds well to fatty acid vesicles<sup>52</sup>. Binding of unstructured  
348 oligos containing AG-repeats or deaza-guanine suggests that guanine itself might directly stabilize  
349 interactions with the gel membrane, plausibly via hydrogen interactions from the Watson-Crick edge  
350 of the nucleotide. It has been proposed that the interaction of adenine and guanine with fatty acid  
351 membranes is dependent on the amino group of the nucleotide interacting with carboxyl groups of  
352 the fatty acid-based membranes<sup>52</sup> and that nucleic acid bases can interact with hydrophobic core of  
353 the phospholipids<sup>33,35,37</sup>. However, we show in addition that the importance of guanine correlates with  
354 its propensity to promote inter- or intra-molecular structures. Guanine can promote structure not only  
355 through Watson-Crick base pairs with cytidine, but also with uracil (G-U wobble<sup>57</sup>) and through non-  
356 canonical base-paired structures including Hoogsteen base pairs and G-quadruplexes<sup>53</sup>. Indeed, we  
357 reveal that G-quadruplexes exhibit enhanced binding to both gel and fluid membranes, providing the  
358 impetus to explore whether such interactions are physiologically relevant.

359

360 The ability for RNA-lipid interactions to influence ribozyme activity demonstrates a proof-of-principle  
361 that spontaneously self-assembling lipid membranes could provide a mechanism for ribo-regulation.  
362 In the present study we had hypothesized that gel membranes would enhance R3C ligase activity by  
363 increasing concentration of the reactants at the membrane surface. Instead, we discovered that  
364 selective guanine-gel membrane interactions had an allosteric effect on the R3C substrate when it was  
365 modified with a G-rich tail to enhance membrane binding. This behaviour in some ways resembles the



366 behaviour of riboswitches with regulatory effects that are derived from sensitivity to physicochemical  
367 conditions or through binding with an interaction partner<sup>58-62</sup>. However, lipid sensitive riboswitches  
368 have not been documented previously. Although the roughly 2-fold change in activity we observe is  
369 much smaller than the dynamic range of known riboswitches, it could still be a significant effect in a  
370 prebiotic or synthetic system<sup>63</sup>. It is now plausible to explore whether synthetic or naturally occurring  
371 RNAs exhibiting sensitivity to lipids could act or be engineered to act as lipid-sensitive riboswitches.

372  
373 Although gel phase membranes are not widely observed in living cells, RNA-gel membrane interactions  
374 could be employed for ribo-regulation in synthetic biological systems. Gel membranes also plausibly  
375 accumulated in ancient prebiotic scenarios, potentially serving as an organizational scaffold, as has  
376 been proposed for “ribofilms” on mineral surfaces<sup>64</sup>. Thus, RNA-gel membrane interactions provide a  
377 plausible means to select RNAs by sequence and structure in primordial and synthetic biological  
378 systems. For example, diverse RNA species can be segregated or co-localized based on their differential  
379 membrane affinities. Furthermore, selective RNA-membrane localization can be controlled by shifting  
380 the temperature above and below the membrane gel-liquid transition temperature, thereby turning  
381 on and off RNA-membrane binding. Selective RNA-membrane interactions would also influence the  
382 sequence space explored by evolving ribozymes leading to enhanced or novel functions. Looking  
383 forward, RNA-gel membrane interactions might facilitate the emergence of novel functions through  
384 artificial and natural evolution of ribozymes in the presence of membranes.

385  
386 In conclusion, our findings reveal that lipids, which are present in every modern cell and were plausibly  
387 part of a prebiotic world<sup>45,65</sup>, can interact with RNA and change its activity. These findings have  
388 significant applications in fields such as synthetic biology, where merging the selective affinities of  
389 aptamers with ribozyme activity (aptazymes) is currently a developing field<sup>67-69</sup>. Furthermore, insights  
390 from the present study can already be implemented in bioengineering applications such as in  
391 improving mRNA drug delivery mechanisms and introducing lipid sensitive ribo-regulation to synthetic  
392 ribozyme networks. More generally, this study gives a simple answer to a fundamental question in the  
393 debate on the origin of life – how could primordial RNA molecules be regulated?

394

#### 395 **Acknowledgements:**

396 We would like to thank Mario Mörl, Gerald Joyce, Ilya Levental, Robert Ernst, Andre Nadler, Dora Tang,  
397 Grzegorz Chwastek, Michał Grzybek and Mike Thompson for helpful discussions and feedback. We  
398 would also like to thank Anatol Fritsch for home-made microscopy stage-top temperature-control  
399 device. This work was supported by the B CUBE of the TU Dresden, a Simons Foundation Fellowship  
400 (to J.S.), a German Federal Ministry of Education and Research BMBF grant (to J.S., project 03Z22EN12),  
401 and a VW Foundation “Life” grant (to J.S., project 93090).

402

403 The authors declare no conflict of interests.

404

405

406

407

408

409

410

## 411 References

412

413 1. Pace, N. R. & Marsh, T. L. RNA catalysis and the origin of life. *Origins Life Evol B* **16**, 97–116  
414 (1985).

415 2. Gilbert, W. Origin of life: The RNA world. *Nature* **319**, 618–618 (1986).

416 3. Rich, A. On the problems of evolution and biochemical information transfer. *Horizons in*  
417 *biochemistry* 103–126 (1962).

418 4. Breaker, R. R. Engineered allosteric ribozymes as biosensor components. *Curr Opin Biotech*  
419 **13**, 31–39 (2002).

420 5. Wittmann, A. & Suess, B. Engineered riboswitches: Expanding researchers' toolbox with  
421 synthetic RNA regulators. *Febs Lett* **586**, 2076–2083 (2012).

422 6. Isaacs, F. J., Dwyer, D. J. & Collins, J. J. RNA synthetic biology. *Nat Biotechnol* **24**, 545–554  
423 (2006).

424 7. Bartel, D. & Szostak, J. Isolation of new ribozymes from a large pool of random sequences.  
425 *Science* **261**, 1411–1418 (1993).

426 8. Eklund, E., Szostak, J. & Bartel, D. Structurally complex and highly active RNA ligases  
427 derived from random RNA sequences. *Science* **269**, 364–370 (1995).

428 9. Robertson, M. P., Hesselberth, J. R. & Ellington, A. D. Optimization and optimality of a  
429 short ribozyme ligase that joins non-Watson–Crick base pairings. *Rna* **7**, 513–523 (2001).

430 10. Rogers, J. & Joyce, G. F. The effect of cytidine on the structure and function of an RNA  
431 ligase ribozyme. *Rna* **7**, 395–404 (2001).

432 11. Paul, N. & Joyce, G. F. A self-replicating ligase ribozyme. *Proc National Acad Sci* **99**,  
433 12733–12740 (2002).

434 12. Lincoln, T. A. & Joyce, G. F. Self-Sustained Replication of an RNA Enzyme. *Science* **323**,  
435 1229–1232 (2009).

436 13. Saragliadis, A., Krajewski, S. S., Rehm, C., Narberhaus, F. & Hartig, J. S. Thermozymes:  
437 synthetic RNA thermometers based on ribozyme activity. *Rna Biol* **10**, 1009–1016 (2013).

438 14. Ferretti, A. C. & Joyce, G. F. Kinetic Properties of an RNA Enzyme That Undergoes Self-  
439 Sustained Exponential Amplification. *Biochemistry-us* **52**, 1227–1235 (2013).

440 15. Lam, B. J. & Joyce, G. F. Autocatalytic aptazymes enable ligand-dependent exponential  
441 amplification of RNA. *Nat Biotechnol* **27**, 288–292 (2009).

442 16. Janas, T., Janas, T. & Yarus, M. A membrane transporter for tryptophan composed of  
443 RNA. *Rna* **10**, 1541–1549 (2004).

- 444 17. Pino, S., Ciciriello, F., Costanzo, G. & Mauro, E. D. Nonenzymatic RNA Ligation in Water\*.  
445 *J Biol Chem* **283**, 36494–36503 (2008).
- 446 18. Guerrier-Takada, C., Gardiner, K., Marsh, T., Pace, N. & Altman, S. The RNA moiety of  
447 ribonuclease P is the catalytic subunit of the enzyme. *Cell* **35**, 849–857 (1983).
- 448 19. Anella, F. & Danelon, C. Prebiotic Factors Influencing the Activity of a Ligase Ribozyme.  
449 *Life* **7**, 17 (2017).
- 450 20. Dai, X., Zhang, S. & Zaleta-Rivera, K. RNA: interactions drive functionalities. *Mol Biol Rep*  
451 **47**, 1413–1434 (2020).
- 452 21. Müller, U. F. & Bartel, D. P. Improved polymerase ribozyme efficiency on hydrophobic  
453 assemblies. *Rna* **14**, 552–562 (2008).
- 454 22. Anella, F. & Danelon, C. Reconciling Ligase Ribozyme Activity with Fatty Acid Vesicle  
455 Stability. *Life* **4**, 929–943 (2014).
- 456 23. Chen, I. A., Salehi-Ashtiani, K. & Szostak, J. W. RNA Catalysis in Model protocell Vesicles. *J*  
457 *Am Chem Soc* **127**, 13213–13219 (2005).
- 458 24. Mansy, S. S., Schrum, J. P., Krishnamurthy, M., Tobé, S., Treco, D. A. & Szostak, J. W.  
459 Template-directed synthesis of a genetic polymer in a model protocell. *Nature* **454**, 122–125  
460 (2008).
- 461 25. Bianconi, G., Zhao, K., Chen, I. A. & Nowak, M. A. Selection for Replicases in Protocells.  
462 *Plos Comput Biol* **9**, e1003051 (2013).
- 463 26. Budker, V. G., Kazatchkov, Yu. A. & Naumova, L. P. Polynucleotides adsorb on  
464 mitochondrial and model lipid membranes in the presence of bivalent cations. *Febs Lett* **95**,  
465 143–146 (1978).
- 466 27. McManus, J. J., Rädler, J. O. & Dawson, K. A. Does Calcium Turn a Zwitterionic Lipid  
467 Cationic? *J Phys Chem B* **107**, 9869–9875 (2003).
- 468 28. Kharakoz, D. P., Khusainova, R. S., Gorelov, A. V. & Dawson, K. A. Stoichiometry of  
469 dipalmitoylphosphatidylcholine-DNA interaction in the presence of Ca<sup>2+</sup>: a temperature-  
470 scanning ultrasonic study. *Febs Lett* **446**, 27–29 (1999).
- 471 29. Gromelski, S. & Brezesinski, G. Adsorption of DNA to zwitterionic DMPE monolayers  
472 mediated by magnesium ions. *Phys Chem Chem Phys* **6**, 5551–5556 (2004).
- 473 30. Uhríková, D., Hanulová, M., Funari, S. S., Khusainova, R. S., Šeršeň, F. & Balgavý, P. The  
474 structure of DNA–DOPC aggregates formed in presence of calcium and magnesium ions: A  
475 small-angle synchrotron X-ray diffraction study. *Biochimica Et Biophysica Acta Bba -*  
476 *Biomembr* **1713**, 15–28 (2005).
- 477 31. Gromelski, S. & Brezesinski, G. DNA Condensation and Interaction with Zwitterionic  
478 Phospholipids Mediated by Divalent Cations. *Langmuir* **22**, 6293–6301 (2006).

- 479 32. McLoughlin, D., Dias, R., Lindman, B., Cardenas, M., Nylander, T., Dawson, K., Miguel, M.  
480 & Langevin, D. Surface Complexation of DNA with Insoluble Monolayers. Influence of  
481 Divalent Counterions. *Langmuir* **21**, 1900–1907 (2005).
- 482 33. Michanek, A., Yanez, M., Wacklin, H., Hughes, A., Nylander, T. & Sparr, E. RNA and DNA  
483 Association to Zwitterionic and Charged Monolayers at the Air–Liquid Interface. *Langmuir*  
484 **28**, 9621–9633 (2012).
- 485 34. Michanek, A., Kristen, N., Höök, F., Nylander, T. & Sparr, E. RNA and DNA interactions  
486 with zwitterionic and charged lipid membranes — A DSC and QCM-D study. *Biochimica Et*  
487 *Biophysica Acta Bba - Biomembr* **1798**, 829–838 (2010).
- 488 35. Suga, K., Tanabe, T., Tomita, H., Shimanouchi, T. & Umakoshi, H. Conformational change  
489 of single-stranded RNAs induced by liposome binding. *Nucleic Acids Res* **39**, 8891–8900  
490 (2011).
- 491 36. Lu, D. & Rhodes, D. G. Binding of phosphorothioate oligonucleotides to zwitterionic  
492 liposomes. *Biochimica Et Biophysica Acta Bba - Biomembr* **1563**, 45–52 (2002).
- 493 37. Marty, R., N’soukpoé-Kossi, C. N., Charbonneau, D. M., Kreplak, L. & Tajmir-Riahi, H.-A.  
494 Structural characterization of cationic lipid–tRNA complexes. *Nucleic Acids Res* **37**, 5197–  
495 5207 (2009).
- 496 38. Khvorova, A., Kwak, Y.-G., Tamkun, M., Majerfeld, I. & Yarus, M. RNAs that bind and  
497 change the permeability of phospholipid membranes. *Proc National Acad Sci* **96**, 10649–  
498 10654 (1999).
- 499 39. Vlassov, A. & Yarus, M. Interaction of RNA with Phospholipid Membranes. *Mol Biol+* **36**,  
500 389–393 (2002).
- 501 40. Vlassov, A., Khvorova, A. & Yarus, M. Binding and disruption of phospholipid bilayers by  
502 supramolecular RNA complexes. *Proc National Acad Sci* **98**, 7706–7711 (2001).
- 503 41. Pannwitt, S., Slama, K., Depoix, F., Helm, M. & Schneider, D. Against Expectations:  
504 Unassisted RNA Adsorption onto Negatively Charged Lipid Bilayers. *Langmuir* **35**, 14704–  
505 14711 (2019).
- 506 42. Janas, T., Janas, T. & Yarus, M. Specific RNA binding to ordered phospholipid bilayers.  
507 *Nucleic Acids Res* **34**, 2128–2136 (2006).
- 508 43. Kruger, K., Grabowski, P. J., Zaug, A. J., Sands, J., Gottschling, D. E. & Cech, T. R. Self-  
509 splicing RNA: Autoexcision and autocyclization of the ribosomal RNA intervening sequence  
510 of tetrahymena. *Cell* **31**, 147–157 (1982).
- 511 44. White, S. H., Wimley, W. C., Ladokhin, A. S. & Hristova, K. [4] Protein folding in  
512 membranes: Determining energetics of peptide-bilayer interactions. *Methods Enzymol* **295**,  
513 62–87 (1998).

- 514 45. Rushdi, A. I. & Simoneit, B. R. T. Lipid Formation by Aqueous Fischer-Tropsch-Type  
515 Synthesis over a Temperature Range of 100 to 400 °C. *Origins Life Evol B* **31**, 103–118 (2001).
- 516 46. Quarless, S. A. & Cantor, C. R. Analysis of RNA structure by ultraviolet crosslinking and  
517 denaturation gel electrophoresis. *Anal Biochem* **147**, 296–300 (1985).
- 518 47. Behlen, L. S., Sampson, J. R. & Uhlenbeck, O. C. An ultraviolet light-induced crosslink in  
519 yeast tRNA phe. *Nucleic Acids Res* **20**, 4055–4059 (1992).
- 520 48. Nejedlý, K., Kittner, R., Pospíšilová, Š. & Kypr, J. Crosslinking of the complementary  
521 strands of DNA by UV light: dependence on the oligonucleotide composition of the UV  
522 irradiated DNA. *Biochimica Et Biophysica Acta Bba - Gene Struct Expr* **1517**, 365–375 (2001).
- 523 49. Mládek, A., Sharma, P., Mitra, A., Bhattacharyya, D., Šponer, J. & Šponer, J. E. Trans  
524 Hoogsteen/Sugar Edge Base Pairing in RNA. Structures, Energies, and Stabilities from  
525 Quantum Chemical Calculations. *J Phys Chem B* **113**, 1743–1755 (2009).
- 526 50. Roy, A., Panigrahi, S., Bhattacharyya, M. & Bhattacharyya, D. Structure, Stability, and  
527 Dynamics of Canonical and Noncanonical Base Pairs: Quantum Chemical Studies. *J Phys*  
528 *Chem B* **112**, 3786–3796 (2008).
- 529 51. Lee, J. S., Evans, D. H. & Morgan, A. R. Polypurine DNAs and RNAs form secondary  
530 structures which may be tetra-stranded. *Nucleic Acids Res* **8**, 4305–4320 (1980).
- 531 52. Black, R. A., Blosser, M. C., Stottrup, B. L., Tavakley, R., Deamer, D. W. & Keller, S. L.  
532 Nucleobases bind to and stabilize aggregates of a prebiotic amphiphile, providing a viable  
533 mechanism for the emergence of protocells. *Proc National Acad Sci* **110**, 13272–13276  
534 (2013).
- 535 53. Gellert, M., Lipsett, M. N. & Davies, D. R. Helix formation by guanylic acid. *Proc National*  
536 *Acad Sci* **48**, 2013–2018 (1962).
- 537 54. Murchie, A. I. H. & Lilley, D. M. J. Retinoblastoma susceptibility genes contain 5'  
538 sequences with a high propensity to form guanine-tetrad structures. *Nucleic Acids Res* **20**,  
539 49–53 (1992).
- 540 55. Venczel, E. A. & Sen, D. Parallel and antiparallel G-DNA structures from a complex  
541 telomeric sequence. *Biochemistry-us* **32**, 6220–6228 (1993).
- 542 56. Dumas, L., Herviou, P., Dassi, E., Cammas, A. & Millevoi, S. G-Quadruplexes in RNA  
543 Biology: Recent Advances and Future Directions. *Trends Biochem Sci* **46**, 270–283 (2020).
- 544 57. Ladner, J. E., Jack, A., Robertus, J. D., Brown, R. S., Rhodes, D., Clark, B. F. & Klug, A.  
545 Structure of yeast phenylalanine transfer RNA at 2.5 Å resolution. *Proc National Acad Sci* **72**,  
546 4414–4418 (1975).
- 547 58. Johansson, J., Mandin, P., Renzoni, A., Chiaruttini, C., Springer, M. & Cossart, P. An RNA  
548 Thermosensor Controls Expression of Virulence Genes in *Listeria monocytogenes*. *Cell* **110**,  
549 551–561 (2002).



- 550 59. Winkler, W., Nahvi, A. & Breaker, R. R. Thiamine derivatives bind messenger RNAs  
551 directly to regulate bacterial gene expression. *Nature* **419**, 952–956 (2002).
- 552 60. Morita, M. T., Tanaka, Y., Kodama, T. S., Kyogoku, Y., Yanagi, H. & Yura, T. Translational  
553 induction of heat shock transcription factor  $\zeta$ 32: evidence for a built-in RNA thermosensor.  
554 *Gene Dev* **13**, 655–665 (1999).
- 555 61. Schilling, O., Langbein, I., Müller, M., Schmalisch, M. H. & Stülke, J. A protein-dependent  
556 riboswitch controlling ptsGHI operon expression in *Bacillus subtilis*: RNA structure rather  
557 than sequence provides interaction specificity. *Nucleic Acids Res* **32**, 2853–2864 (2004).
- 558 62. Nahvi, A., Sudarsan, N., Ebert, M. S., Zou, X., Brown, K. L. & Breaker, R. R. Genetic Control  
559 by a Metabolite Binding mRNA. *Chem Biol* **9**, 1043–1049 (2002).
- 560 63. Drobot, B., Iglesias-Artola, J. M., Vay, K. L., Mayr, V., Kar, M., Kreysing, M., Mutschler, H.  
561 & Tang, T.-Y. D. Compartmentalised RNA catalysis in membrane-free coacervate protocells.  
562 *Nat Commun* **9**, 3643 (2018).
- 563 64. Baross, J. A. & Martin, W. F. The Ribofilm as a Concept for Life's Origins. *Cell* **162**, 13–15  
564 (2015).
- 565 65. Patel, B. H., Percivalle, C., Ritson, D. J., Duffy, C. D. & Sutherland, J. D. Common origins of  
566 RNA, protein and lipid precursors in a cyanosulfidic protometabolism. *Nat Chem* **7**, 301–307  
567 (2015).
- 568 66. Brady, R. C. & Pettit, R. Mechanism of the Fischer-Tropsch reaction. The chain  
569 propagation step. *J Am Chem Soc* **103**, 1287–1289 (1981).
- 570 67. Robertson, M. P. & Ellington, A. D. Design and optimization of effector-activated  
571 ribozyme ligases. *Nucleic Acids Res* **28**, 1751–1759 (2000).
- 572 68. Debais, M., Lelievre, A., Smietana, M. & Müller, S. Splitting aptamers and nucleic acid  
573 enzymes for the development of advanced biosensors. *Nucleic Acids Res* **48**, 3400–3422  
574 (2020).
- 575 69. Stifel, J., Spöring, M. & Hartig, J. S. Expanding the toolbox of synthetic riboswitches with  
576 guanine-dependent aptazymes. *Synthetic Biology* **4**, ysy022- (2019).
- 577 70. Janas, T. & Yarus, M. Visualization of membrane RNAs. *Rna* **9**, 1353–1361 (2003).
- 578 71. Walker, S. C., Avis, J. M. & Conn, G. L. General plasmids for producing RNA in vitro  
579 transcripts with homogeneous ends. *Nucleic Acids Res* **31**, e82–e82 (2003).
- 580 72. Kuzmine, I., Gottlieb, P. A. & Martin, C. T. Binding of the Priming Nucleotide in the  
581 Initiation of Transcription by T7 RNA Polymerase\*. *J Biol Chem* **278**, 2819–2823 (2003).
- 582 73. Schmidt, M. L., Ziani, L., Boudreau, M. & Davis, J. H. Phase equilibria in DOPC/DPPC:  
583 Conversion from gel to subgel in two component mixtures. *J Chem Phys* **131**, 175103 (2009).

584 74. Schindelin, J., Arganda-Carreras, I., Frise, E., Kaynig, V., Longair, M., Pietzsch, T.,  
585 Preibisch, S., Rueden, C., Saalfeld, S., Schmid, B., Tinevez, J.-Y., White, D. J., Hartenstein, V.,  
586 Eliceiri, K., Tomancak, P. & Cardona, A. Fiji: an open-source platform for biological-image  
587 analysis. *Nat Methods* **9**, 676–682 (2012).

588 75. Chen, P. S., Toribara, T. Y. & Warner, H. Microdetermination of Phosphorus. *Anal Chem*  
589 **28**, 1756–1758 (1956).

590

## 591 **Materials and methods**

### 592 **Materials**

593 Dipalmitoylphosphatidylcholine (DPPC), dioleoylphosphatidylcholine (DOPC),  
594 dimyristoylphosphatidylcholine (DMPC) and biotinylated phosphatidylethanolamine (18:1 biotinyl cap  
595 PE) were purchased from Avanti Polar Lipids (USA) and were used without further purification.  
596 Cholesterol was purchased from Sigma Aldrich (USA). DiD was purchased from Invitrogen (USA).  
597 HEPES, MgCl<sub>2</sub> and CaCl<sub>2</sub> were purchased from CarlRoth (Germany) and were at least >99% pure. All  
598 solutions were prepared in MilliQ water, Merck Millipore (USA).

599

600

### 601 **RNA**

602 The R3C ligase construct<sup>10</sup> was cloned into the pRZ plasmid<sup>71</sup> using the InFusion cloning system (Takara  
603 Bio, Japan). To ensure correct length of the transcript, pRZ-R3C plasmid was treated with EcoRI-HF  
604 (NEB, USA). RNA was expressed using T7 RNA polymerase (homemade, MPI-CBG, Germany) at 37 °C  
605 overnight incubation, followed by 10 cycles of 5' 60 °C -> 5' 24 °C (HDV cleavage of construct to release  
606 pure R3C) and DNase I treatment (Thermo Scientific, USA). 75-85 nt randomised oligomer was  
607 expressed using artificial DNA template (Eurofins Genomics, Germany) – both R3C and randomer were  
608 purified by phenol-chloroform-isoamyl alcohol extraction, denaturing PAGE and electroelution.

609

610 Synthesis of the deaza-G quadruplex RNA was conducted using T7 transcription on a synthesized DNA  
611 template, as described above, however instead of GTP, 7-deaza-GTP (Trilink Biotechnologies, USA) was  
612 used. To enhance transcription efficiency, 1 mM GMP was added to the solution<sup>72</sup>.

613

614 5'-6-FAM labelled R3C substrates, G quadruplexes as well as other short oligomers used in binding  
615 assays were obtained from Integrated DNA Technologies (USA) and used without further purification.

616

617 All of the RNA sequences are presented in **Supplementary Table 2**.

618

619

### 620 **Methods**

621 All of the RNA incubations were prepared in DNA low bind tubes (Sarstedt, Germany) at the constant  
622 temperature of 24 °C in buffer composed of 10 mM HEPES pH 7, 5 mM CaCl<sub>2</sub>, and 5 mM MgCl<sub>2</sub>. RNA  
623 concentration was determined by measuring absorbance at 260 nm (SPARK 20M, TECAN, Switzerland).  
624 Before every incubation RNA was preheated in SafeLock tubes (90 °C, 5'; Eppendorf, Switzerland) to  
625 ensure unfolded RNA structures. Denaturing PAGE analysis was performed using 8 – 20% 19:1  
626 acrylamide:bisacrylamide gel composition with 8 M urea, whereas native gels were composed of 6 –

627 10% 29:1 acrylamide:bisacrylamide mix. Before denaturing PAGE all of the samples were ethanol  
628 precipitated.

629

630 Structure of R3C ligase from **Fig. 3b** was generated using RNA structure Fold tool from Mathews lab  
631 (<https://rna.urmc.rochester.edu/RNAstructureWeb/>).

632

633

### 634 **Giant unilamellar vesicle (GUV) preparation and microscopy imaging**

635 Gel-liquid phase separated vesicles were prepared from mixtures of DOPC:DPPC in a 1:1 molar ratio<sup>73</sup>  
636 with 0.5 mol% DiD. 20 nmol of total lipids were evenly distributed on Pt electrodes and dried under a  
637 vacuum for 15 minutes. Electroformation (300 Hz, 2.5 V, 65 °C) was conducted in 1 mM HEPES pH 7  
638 and 300 mM sucrose for 3 hours followed by 30' of lower frequency current to promote GUV formation  
639 (2 Hz, 2.5 V, 65 °C).

640

641 GUVs were visualized in a home-made microscopy chamber with temperature control in isosmotic  
642 solution of glucose and buffer. A Leica DMI8 confocal microscope coupled with a camera (Leica  
643 DFC9000 GTC) was used for image acquisition. For both confocal as well as camera acquisition a 63x  
644 water-immersed objective was used.

645

646 For confocal image acquisition, 488 nm (SybrGold) and 635 nm (DiD) lasers were used at low power  
647 (<0.5%) to avoid photobleaching and the signal was collected using hybrid detectors (500 - 550 nm for  
648 SybrGold and 650 - 750 nm for DiD). Z-scans were acquired as 4 - 8 averaged images per layer and Z-  
649 projected as a sum of the slides using FIJI software<sup>74</sup>.

650

651 Temperature ramps were captured using a camera. 1.5 sec of exposure without binning was used to  
652 acquire each channel and measurements were repeated every 5 seconds. Temperature changes were  
653 registered and calculated to be 3.4 °C/min. Image analysis was conducted in FIJI software.

654

655

### 656 **Small lipid vesicle preparation**

657 Lipid chloroform stocks were pipetted into a glass vial and briefly evaporated under a steady flow of  
658 nitrogen gas. To remove organic solvent residues, a lipid film was dried under vacuum overnight. To  
659 obtain multi-layer vesicles (MLVs), lipid films were hydrated in reaction buffer, with a final lipid  
660 concentration of 10 mM. Buffer-lipid mixtures were shaken above the melting temperature of the  
661 lipids for one hour. A cloudy liposome suspension was freeze-and-thawed 10x and extruded 17x  
662 through 100 nm polycarbonate filters (Merck Millipore, USA) to reduce multi-lamellarity and achieve  
663 a consistent size distribution of vesicles. Lipid vesicle stocks were kept at 4 °C. Stock lipid  
664 concentrations were confirmed using a phosphate assay<sup>75</sup>.

665

666

### 667 **Dynamic light scattering**

668 The size distribution of lipid vesicles was estimated using a ZetaSizer Nano in 173° backscatter with  
669 multiple narrow mode (high resolution) analysis. Final concentration of lipids was 10 - 25 μM and the  
670 amount of RNA was fixed at a ratio of 10 lipids / nucleotide, unless stated differently. Results were  
671 plotted as the size distribution in the number of detected species (Number PSD).

672

673 **UV-crosslinking assay**

674 RNA was incubated for 10 minutes in the reaction buffer with or without lipids followed by 10 minutes  
675 incubation under UV-B light (300 mW LEUVA77N50KKU00 LED 305 nm) from a distance of 1.5 – 2 cm.  
676 RNA was ethanol precipitated and run on denaturing PAGE. After electrophoresis, gels were  
677 poststained with SybrGold dye in order to visualize all of the RNA species. Each crosslinked band was  
678 quantified together with whole lane intensity; we define crosslinked bands as band which are higher  
679 in mass than the starting RNA and which was not present before UV exposure (**Suppl. 2**). Both values  
680 were blanked (subtraction of gel background intensity and “no incubation” sample intensity from the  
681 same experimental day). To obtain normalized crosslinking, we’ve divided measured values by the  
682 crosslinking efficiency of the lipid-free sample.

683

684

685 **R3C activity assays**

686 5 pmol of R3C ligase was mixed with 0.5 pmol of the substrate to ensure saturation of the system  
687 (pseudo 1<sup>st</sup> order reaction) and to decrease any batch-to-batch differences resulting from R3C  
688 purification. Denatured (preheated in 90 °C) RNA was added to the reaction buffer with or without  
689 lipid vesicles. Incubation was conducted at various concentrations of lipid vesicles, and samples were  
690 ethanol precipitated after 30, 60, 90 and 120 minutes. RNA was analysed on denaturing PAGE using  
691 FIJI software. Product and substrate intensities ( $I_P$  and  $I_S$ , respectively) were quantified and the  
692 concentration of product at time  $t$  was calculated as:

693

694 
$$[P]_t = [S]_0 * \left( \frac{I_P}{I_P + I_S} \right)$$

695

696 Where:

697  $[P]_t$  – product concentration

698  $[S]_0$  – initial substrate concentration

699

700 To determine reaction rates (M/min), all measured product concentration values were fitted using  
701 concatenate linear fit with fixed [0;0] intercept. The slope and standard error values of the fit were  
702 used for statistical comparisons and data plotting.

703

704

705 **Magnetic beads binding assay**

706 Magnetic beads (DynaBeads streptavidin T1, Invitrogen) were coupled with liposomes doped with 0.5  
707 mol% biotinoyl cap PE. Lipid concentration on beads was estimated using a phosphate assay<sup>75</sup>. Lipid  
708 concentration on the non-diluted beads was typically between 500 – 800  $\mu$ M.

709

710

711 RNA (10 – 25 pmol) was incubated in the buffer and liposome-coated beads for 30’ in 24 °C. As a control  
712 (100% samples), non-coupled liposomes were used. After incubation the supernatant was separated  
713 from the beads using a magnet. The amount of RNA left in solution was estimated either using  
714 absorbance or Qubit miRNA quantification kit (ThermoScientific, USA).

715

716 For the absorbance measurements, 20  $\mu$ L of supernatant was pulled and diluted with 80  $\mu$ L of MiliQ  
717 water and absorbance was measured using 1 cm quartz cuvette. Because of the significant lipid-based

718 light scattering, 100% sample values were calculated from a theoretical approach: knowing RNA  
719 concentration we calculated theoretical absorbance in the final RNA dilution.

720

721

722 For the Qubit miRNA quantification assay, 9  $\mu\text{L}$  of supernatant (out of 30  $\mu\text{L}$  reaction mix) was pulled  
723 and incubated with 1.5  $\mu\text{L}$  of 0.5 M EDTA (90  $^{\circ}\text{C}$ , 5'). After incubation 150  $\mu\text{l}$  of 1xQubit dye was added  
724 to the solution and the amount of RNA was measured using a plate reader (SPARK 20M, TECAN; Ex/Em  
725 = 485/530 nm).

726

727

728 The partition coefficient K was calculated according to the following formula:

729

730

731

732

733

$$K = \frac{\frac{[R_L]}{[R_L] + [L]}}{\frac{[R_w]}{[R_w] + [W]}}$$

734 Assuming excess of [L] and [W] over RNA concentration we simplified the equation to:

735

736

737

738

739

$$K = \frac{\frac{[R_L]}{[L]}}{\frac{[R_w]}{[W]}}$$

740 Where:

741 **[R<sub>L</sub>]** – RNA bound to the membranes

742 **[R<sub>w</sub>]** – non-bound RNA

743 **[L]** – outer lipid concentration

744 **[W]** – water concentration

745

746 [R<sub>w</sub>] was calculated as a ratio or readout from the binding assay sample and the 100% sample. [R<sub>L</sub>] = 1  
747 – [R<sub>w</sub>]. We assumed that RNA interacts only with the outer membrane leaflet, so final outer lipid  
748 concentration is equal half of the total lipid amount.

749

750

### 751 **Ultracentrifugation binding assay**

752 RNA was incubated with various concentrations of DPPC vesicles for 30'. After incubation  
753 ultracentrifugation was conducted to pellet vesicles from the solution (125 000 x G, 40', 24  $^{\circ}\text{C}$ ).  
754 Measured fluorescence intensity values were plotted as a function of lipid/oligomer or lipid/nucleotide  
755 ratios normalized to maximum value in the assay, and fitted using Hill's fit (OriginLab software):

756

757

$$f(x) = Start + (End - Start) \frac{x^n}{x^n + k^n}$$

758

759 Where Start and End are function plateau values, k is inflection point of curve and n is cooperativity  
760 index. The inflection point of the curve (k) and its standard error are parameters which we used for  
761 subsequent data analysis.

762



763 **Statistical analysis**

764 All of the binding efficiency, partition coefficient, crosslinking efficiency and R3C activity assays were  
765 repeated at least 3 times. Error bars in figures represent SEM values. Estimated p values in the figures  
766 are result of double sided, unpaired t-student test. We assumed, that a difference is significant if the  
767 p value was lower than 0.05.

768

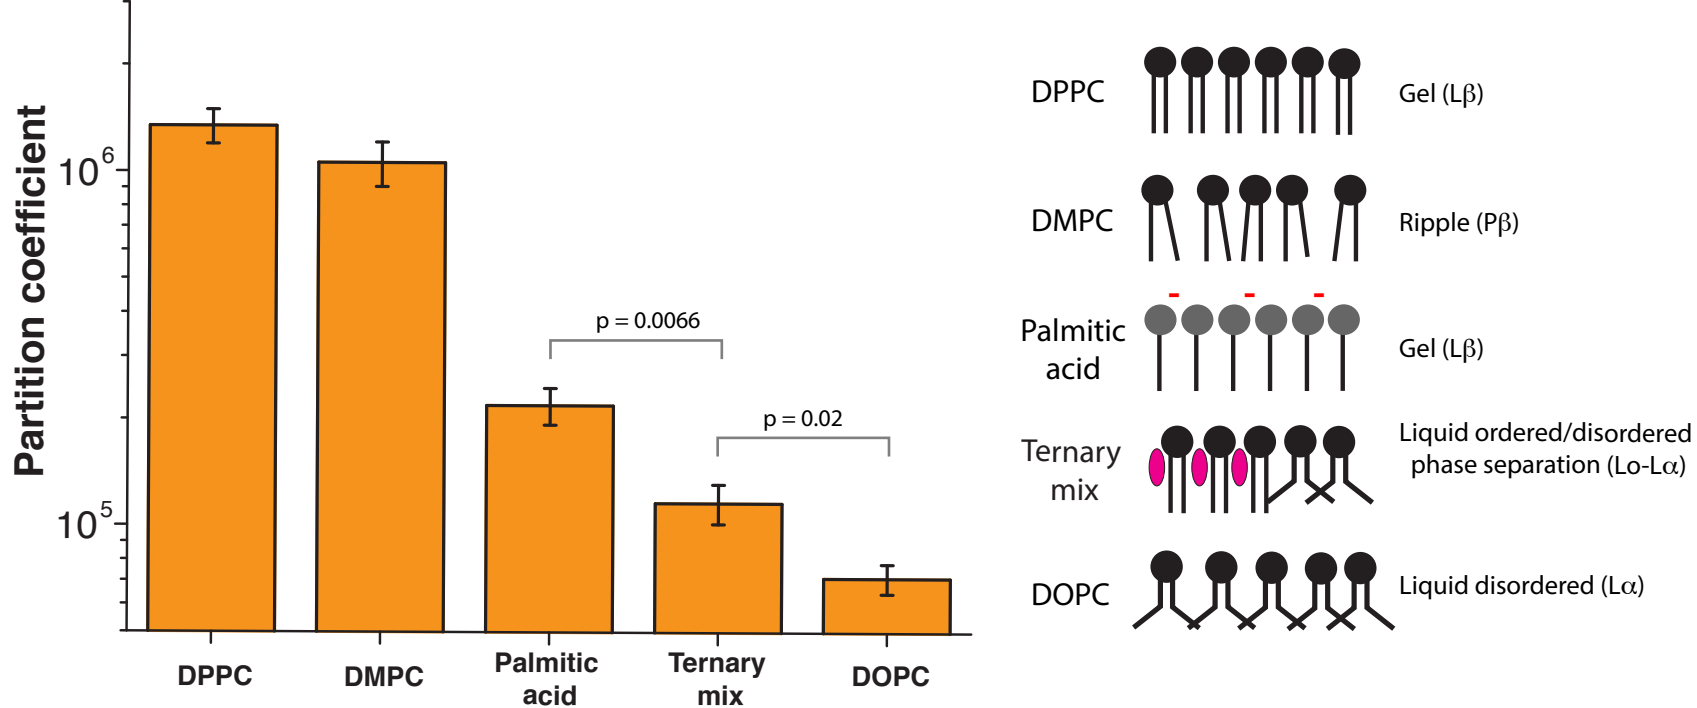

**Fig. 1 RNA-lipid binding depends on membrane fluidity.** Lipid-buffer partition coefficients were determined for the 40 nt random RNA sequences with phosphatidylcholine and fatty acid vesicles. The highest binding was observed for phospholipid-based gel membranes (DPPC, partition coefficient  $>1 \times 10^6$ ) and ripple-phase membrane (DMPC at 24 °C, partition coefficient of  $1 \times 10^6$ ) whereas the lowest binding was observed for liquid disordered membranes (DOPC, partition coefficient  $<1 \times 10^5$ ). The partition coefficient for the palmitic acid gel membranes is significantly higher than for the fluid ternary mixture and DOPC membranes.

**a)** In gel-liquid phase separated membranes, RNA partitions into gel domains

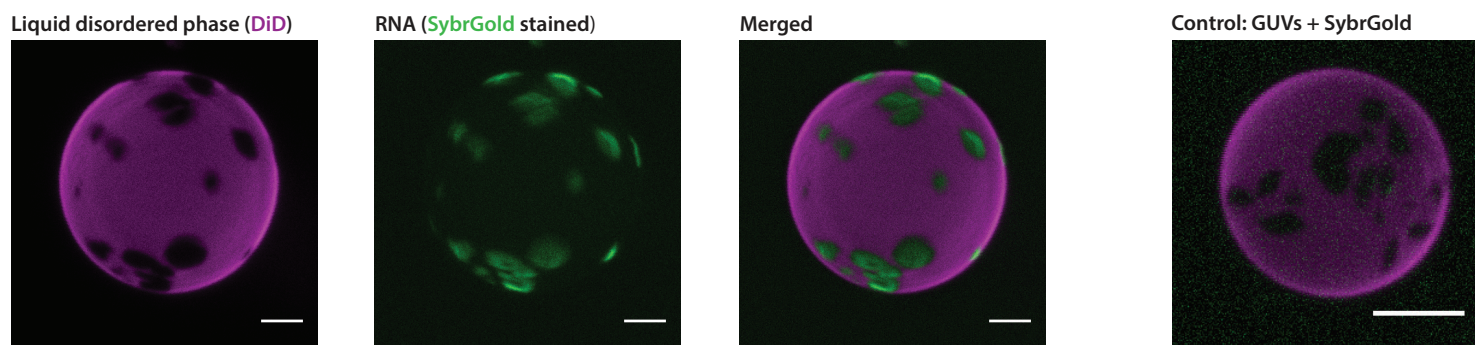

**b)** RNA-lipid binding is abolished when gel phase domains are melted

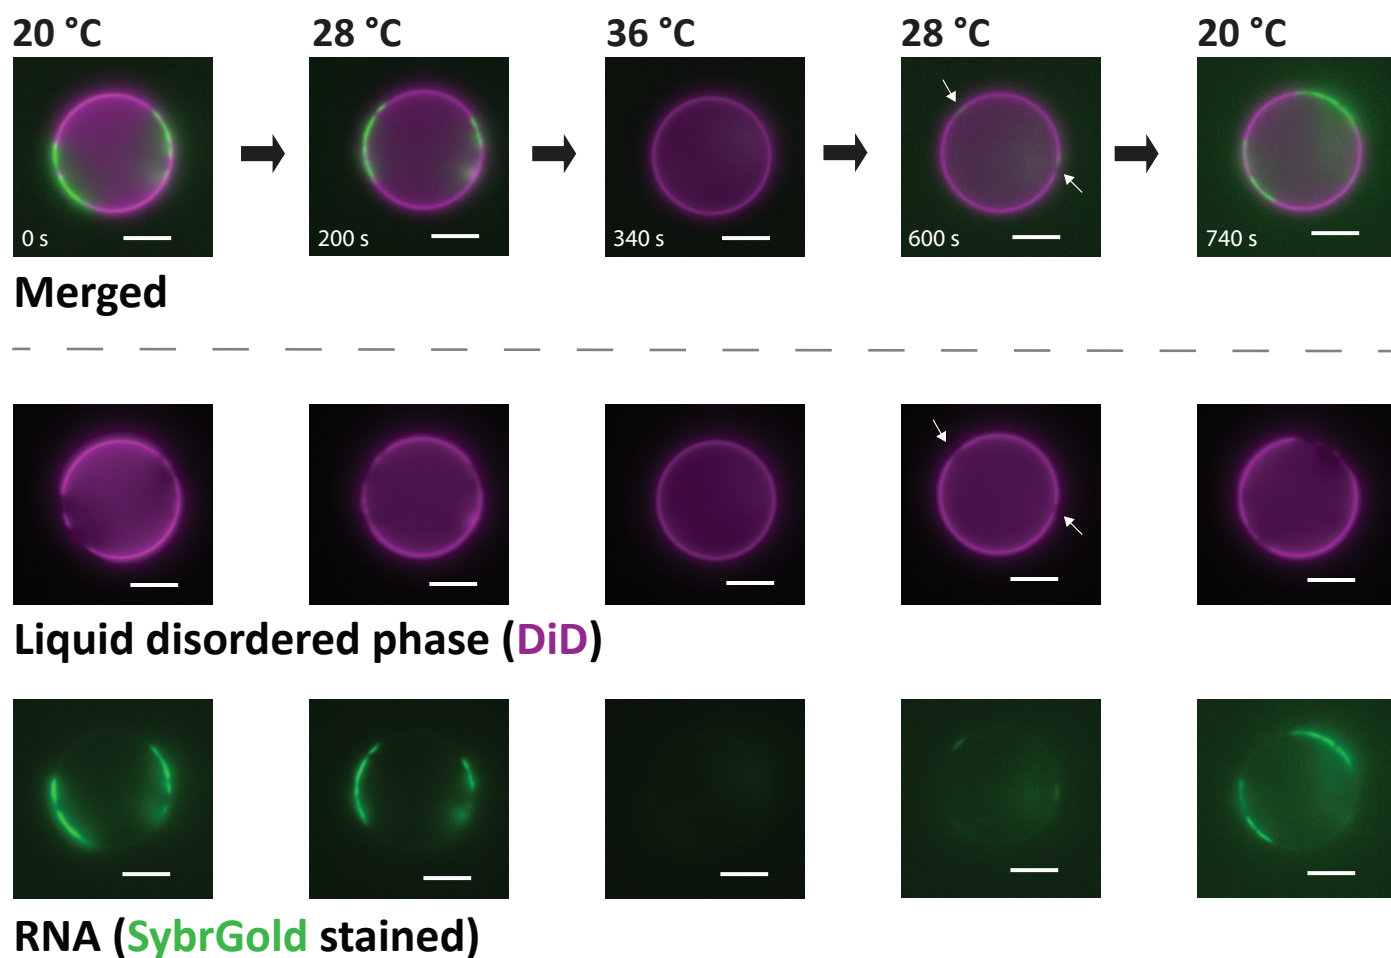

**Fig. 2 RNA selectively binds to gel phase membrane domains.** (a) Gel-liquid phase separated giant unilamellar vesicles (GUVs) were prepared from a mixture of DOPC and DPPC with a molar ratio of 1:1 and labeled with 0.5 mol% of the fluorescent lipophilic probe DiD. DiD is excluded from gel phase domains, which are observed as non-stained regions on the surface of the vesicle. A mixture of random RNA oligomers (40xN) stained with SybrGold is enriched within the gel phase domains. A control without RNA shows that SybrGold itself does not stain the GUVs. (b) When gel phase domains are melted by increasing temperature (3.4 °C/min – see **supplementary movie 1**) RNA no longer enriches at the GUV surface. Decreasing the temperature again restores gel-liquid phase separation and, consequently, RNA-membrane binding (~28 °C, white arrows – see **supplementary movie 2**). All of the scale bars are 5  $\mu$ m.

**a) RNA induces reversible aggregation of lipid vesicles**

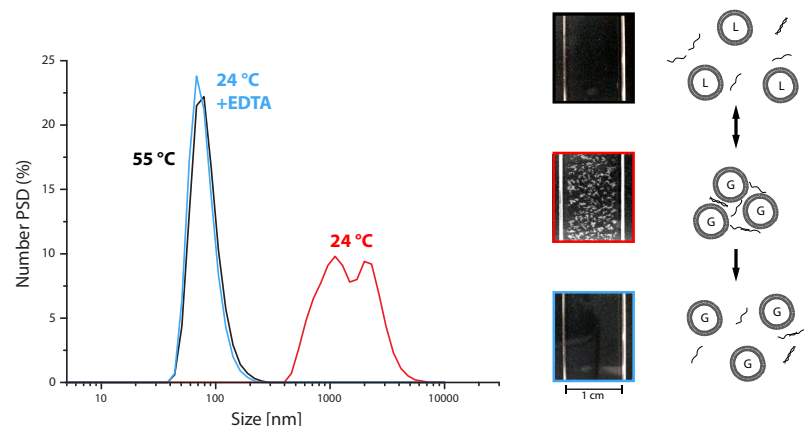

**c) Lipid membranes increase intermolecular RNA-RNA interactions**

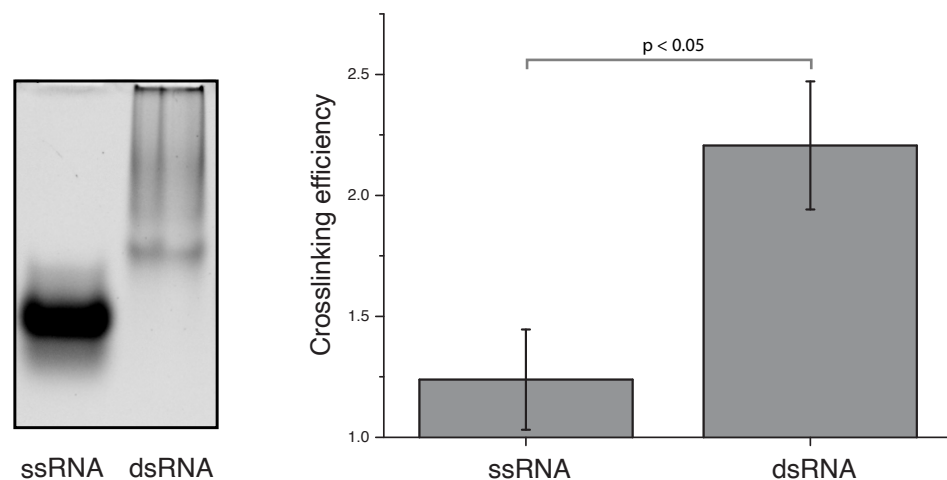

**b) Effect of lipid membrane binding on RNA-RNA interactions**

**R3C ligase: one sequence and structure**

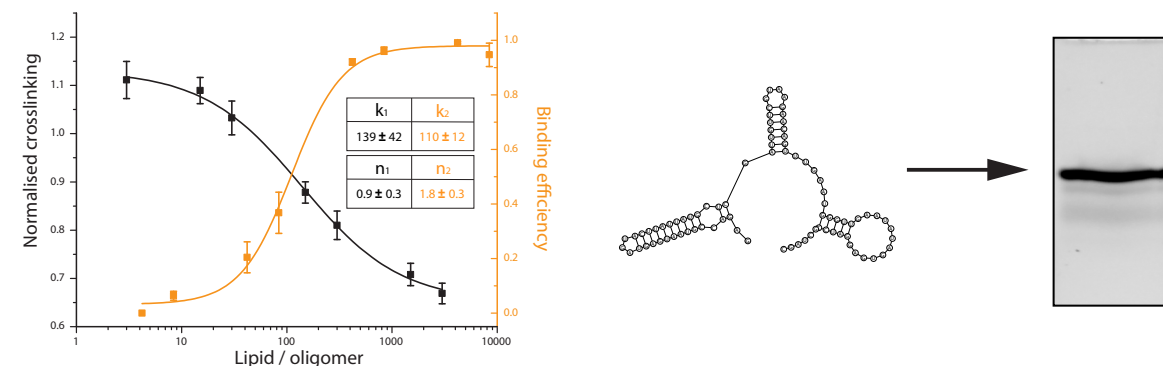

**Random sequence oligomer: multiple inter/intra RNA-RNA interactions**

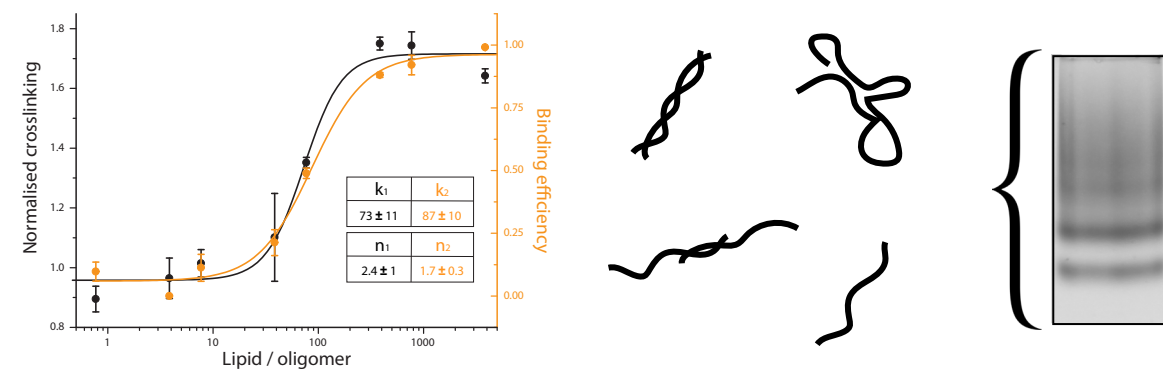

**Fig. 3 RNA-lipid interactions induce reversible aggregation of vesicles and enhance RNA-RNA interactions. (a)** RNA-dependent lipid vesicle aggregation can be observed through changes in vesicle size distribution measured by dynamic light scattering (left), or visually as depicted in the cuvette images (right). The introduction of a randomized pool of RNA oligos to gel lipid membranes (gel phase = G) induces vesicle aggregation, which can be reversed either through chelation of divalent cations with EDTA or by increasing the temperature to achieve membranes in a liquid phase (liquid phase = L). **(b)** R3C ligase (84 nt), which is represented by one structure (see right, native PAGE) shows a small increase in UV-crosslinking at low lipid concentration, whereas crosslinking efficiency decreases at higher lipid concentration. Binding and UV crosslinking are inversely correlated. Randomized RNA oligos (75-85 nt, mix of different inter- and intramolecular structures) show increasing crosslinking efficiency in the presence of lipids; crosslinking and lipid binding are closely correlated. Both R3C and randomer mix have a similar size range (Suppl.2). All of the fits are Hill's function fits; errors are standard error of the fit based on at least 3 replicates. **(c)** The ratio of UV-crosslinking efficiency with and without lipid vesicles was calculated separately for single stranded RNA and double stranded RNA - larger values indicate a higher degree of lipid-dependent cross-linking. Double stranded RNA crosslinking efficiency is enhanced by the presence of lipid membranes, whereas a smaller effect is observed for single stranded RNAs.

**a) Determination of R3C ligase activity**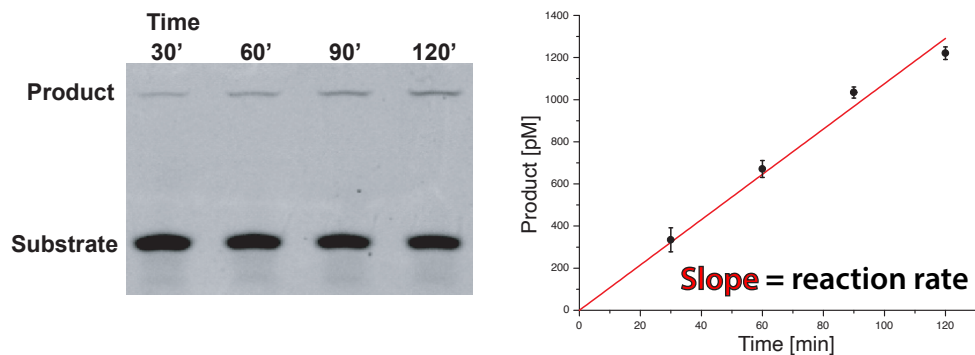**b) Effect of lipid vesicles on R3C ligase activity**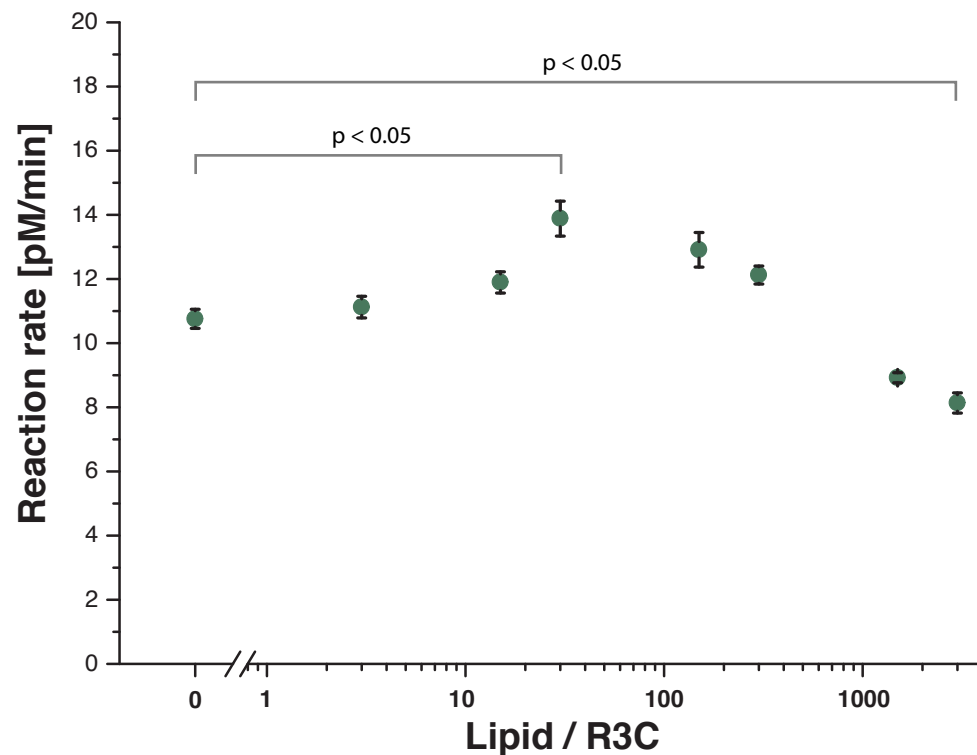**c) Lipid binding and nucleotide characteristics of R3C reactants**

| Oligo     | log(K)      | Nucleotide % |    |    |    | Length |
|-----------|-------------|--------------|----|----|----|--------|
|           |             | G            | A  | C  | U  |        |
| R3C       | 7.42 ± 0.08 | 27           | 28 | 13 | 31 | 84 nt  |
| Substrate | 3.64 ± 0.09 | 8            | 33 | 33 | 25 | 12 nt  |

**Fig. 4 Lipid membranes influence R3C ligase activity through lipid-ligase interactions. (a)** R3C ligase reaction rates were quantified by measuring the amount of product within a two hour incubation time. **(b)** R3C reaction rate is dependent on the presence of gel membranes - increased activity is observed for lower lipid concentration followed by a drop in activity at higher lipid concentration. Error bars represent standard errors from concatenate linear fits from 3 replicates. **(c)** The 12 nt R3C substrate shows several orders of magnitude lower membrane-buffer partition coefficient log(K) compared with the R3C ligase, which could be derived from different compositional or structural characteristics of both RNA species. Error ranges represent standard error calculated from at least 3 binding replicates.



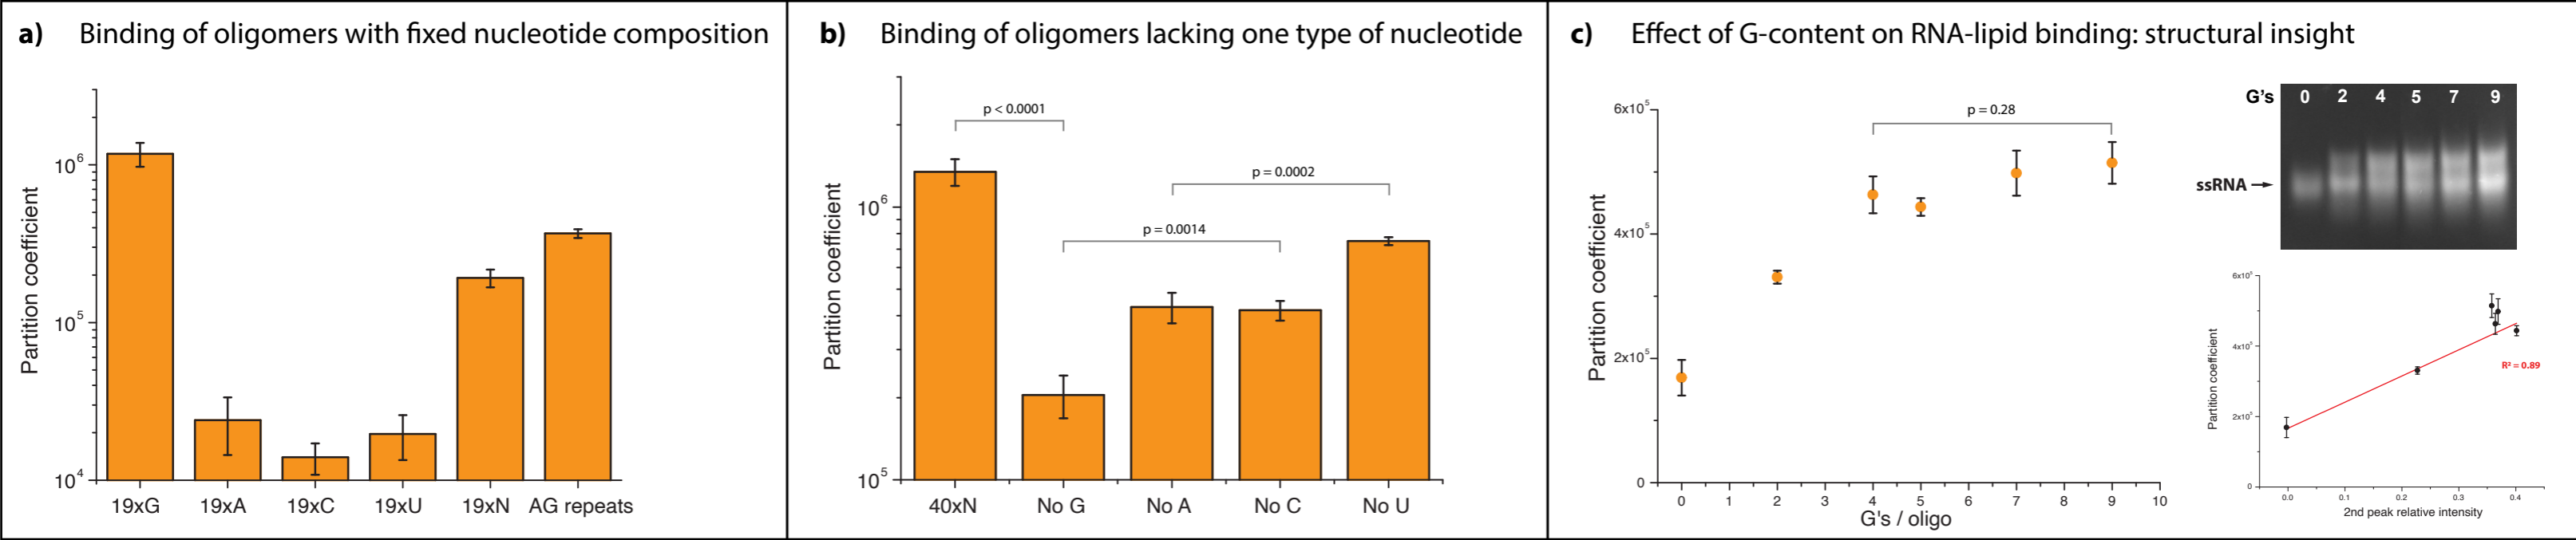

**Fig. 5 RNA-lipid binding is RNA sequence-dependent.** (a) Short 19 nucleotide oligomers show nucleotide-dependent binding to gel membranes, with highest binding observed for the pure G oligomer followed by oligos with randomized sequence or AG repeats. Oligomers containing only A, C or U bases show negligible binding to lipid membranes, compared with the pure G oligomer ( $p$  value < 0.05). (b) Oligonucleotide length also influences binding efficiency as seen in the comparison of (a) 19xN and (b) 40xN. Depletion of one type of nucleotide within oligomers lowers binding efficiency. The absence of G decreased partition coefficient by 6.6x compared to non-depleted RNA, whereas absence of A, U or C showed a less pronounced effect. Significant differences are present between G- and C-deficient RNAs, as well as between A- and U-deficient RNAs. (c) Oligonucleotides with increasing G content showed higher lipid – buffer partition coefficients with values plateauing for oligomers containing more than four G's. Increased binding is correlated with the appearance of second band on native gel, which suggests that structural changes within RNA oligomers might contribute to lipid membrane binding.

**a) Effect of RNA base-pairing on vesicle aggregation and lipid membrane binding**

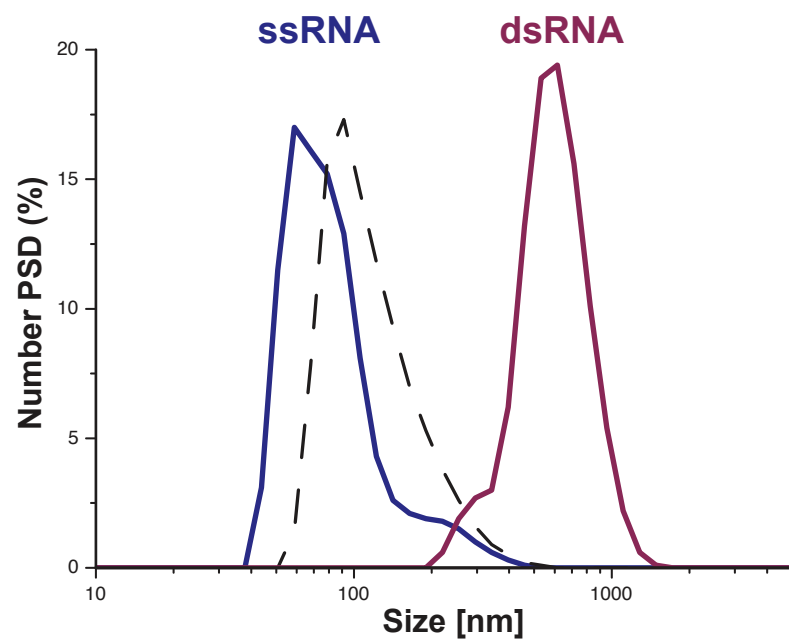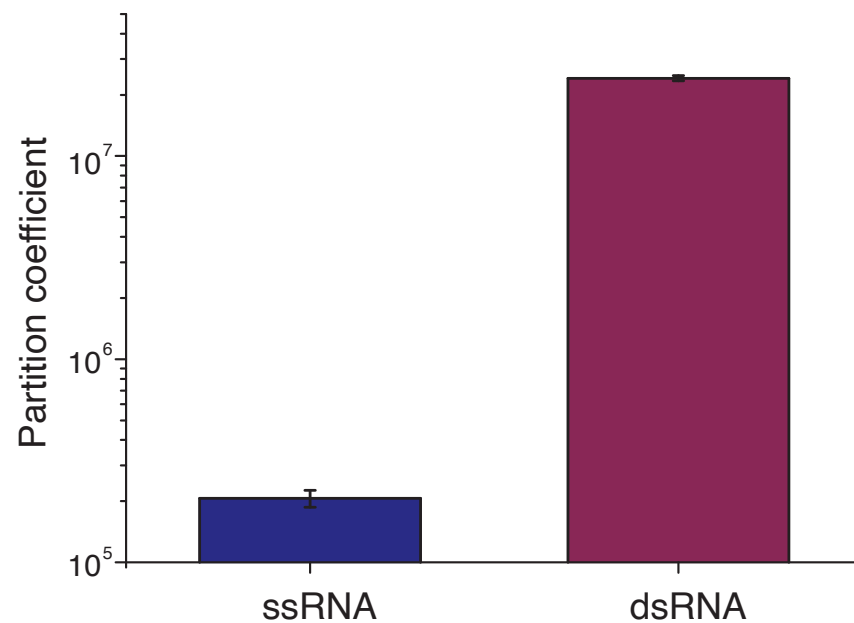

**b) Lipid:RNA binding ratios for ssRNA and dsRNA**

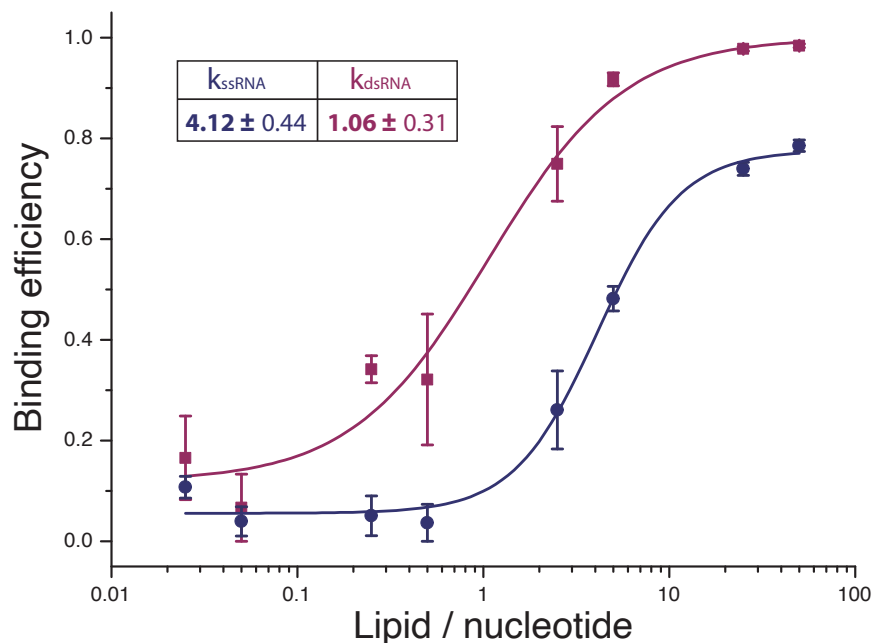

**c) G-quadruplex RNA binds to lipid membranes**

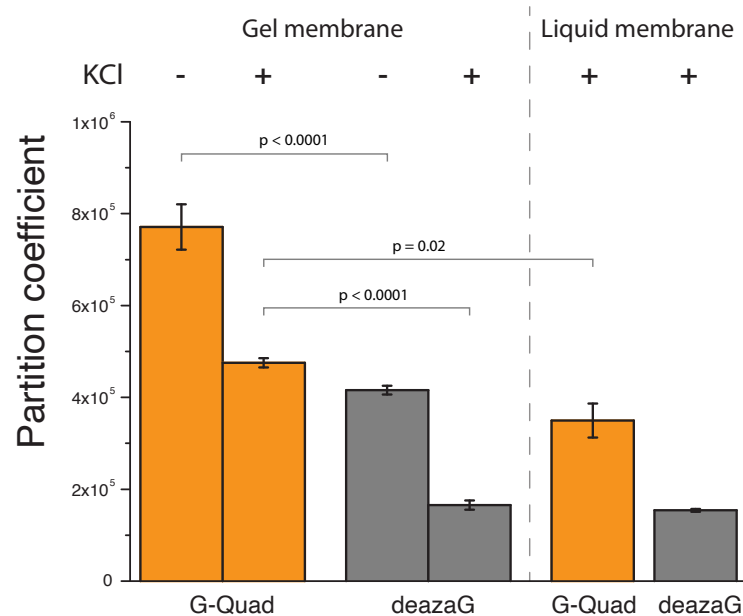

**Fig. 6 RNA-gel membrane binding depends on RNA structure. (a)** The effect of RNA base-pairing structure on lipid vesicle aggregation (left) and membrane binding (right) was evaluated by comparing RNAs with limited ability to create inter- and intramolecular structures (ssRNA: 36 nucleotide CAGU repeats) with 100% complementary double stranded RNAs (dsRNA: mixed ACUG and CAGU oligos). Single stranded RNAs do not cause lipid vesicle aggregation despite moderate membrane binding, whereas double stranded RNA species show both high binding and vesicle aggregation. Dashed black line: DPPC vesicles without RNA. **(b)** RNA:lipid binding ratios (shown in table) estimated from binding curves of ssRNA and dsRNA (plotted) are affected by base pairing. **(c)** 19 nt G-quadruplex forming RNA binds to both gel and liquid membranes in the presence and absence of KCl ions. The G-quadruplex oligomer has significantly higher partition coefficients than an oligo with the same sequence containing deaza-guanine, which can't form G-quadruplex structures.

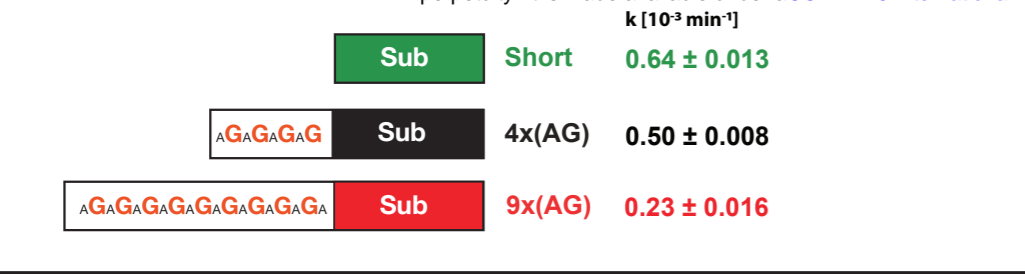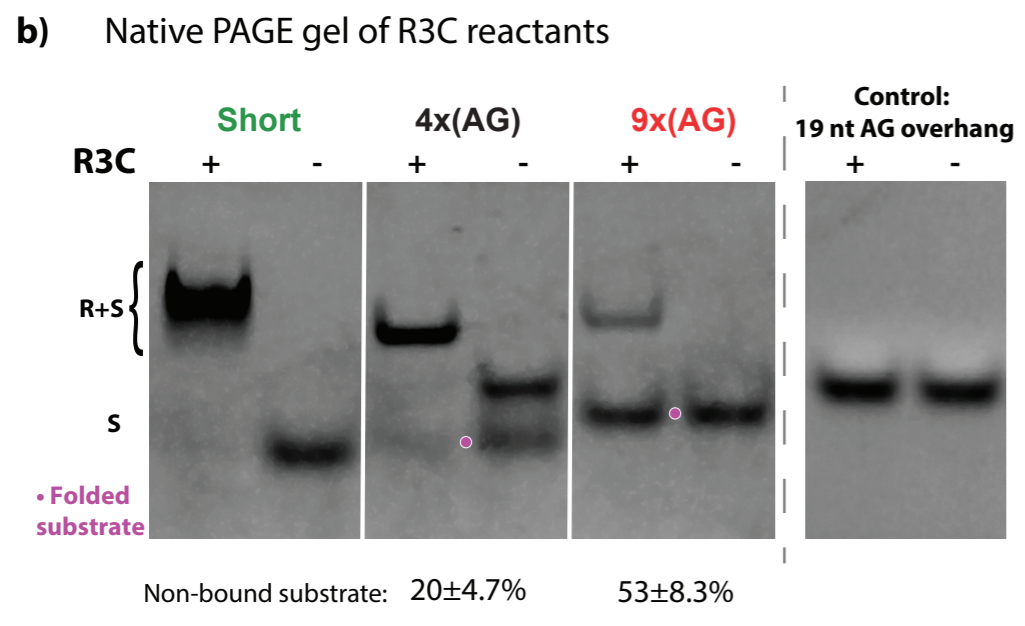

**c) Membrane-binding efficiency of modified R3C substrates**

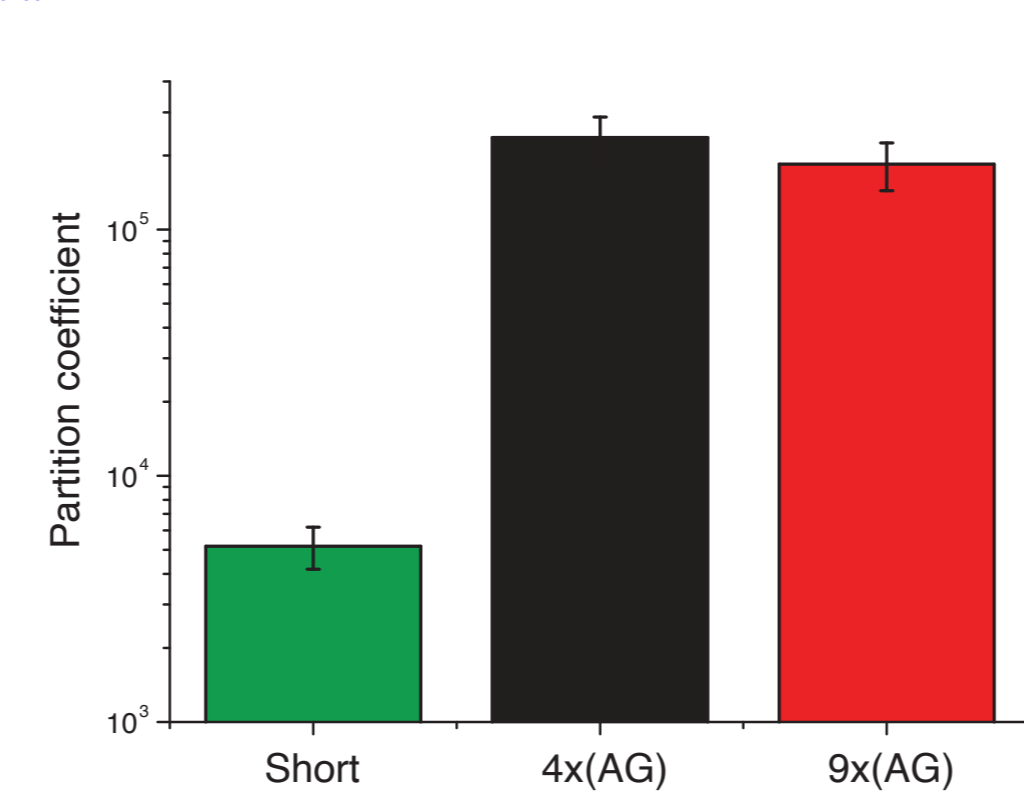

**d) Effect of lipids on R3C ligation rate with modified substrates**

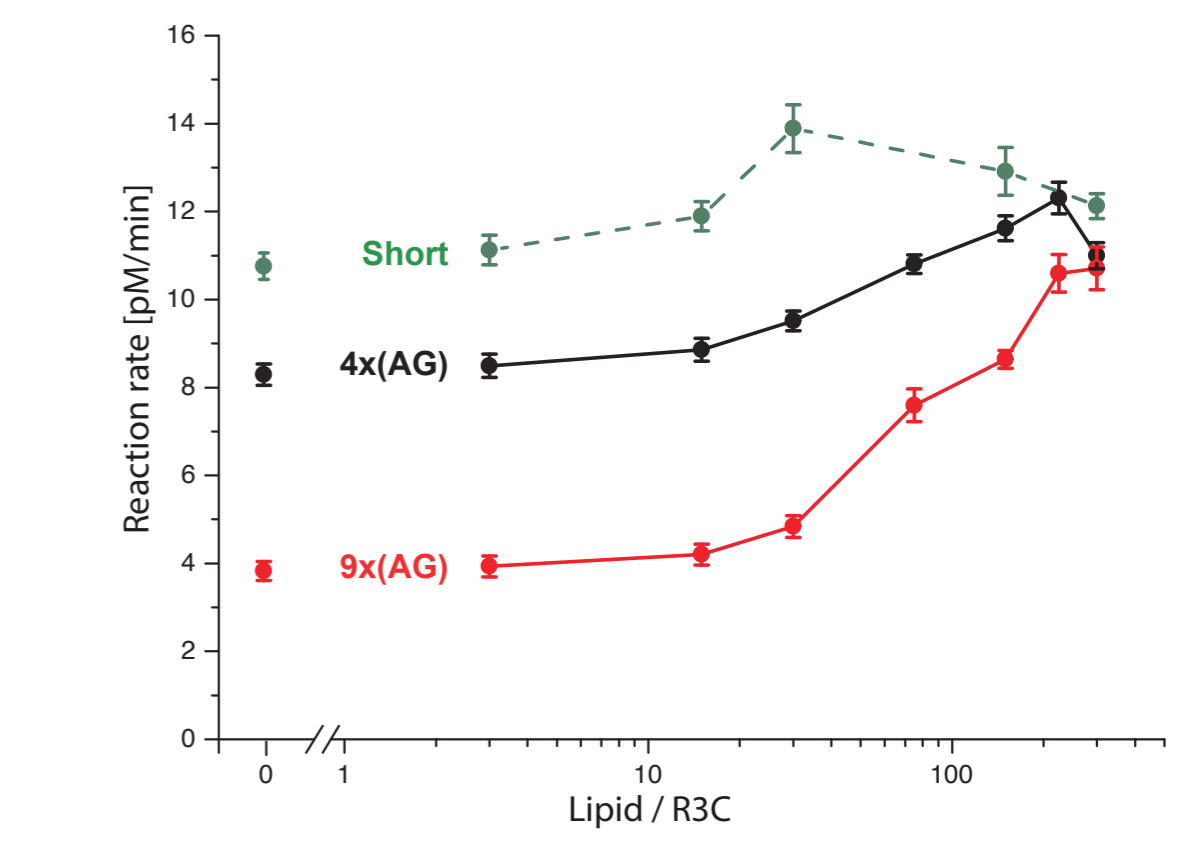

**e) G-rich overhang screening rescues reaction rate**

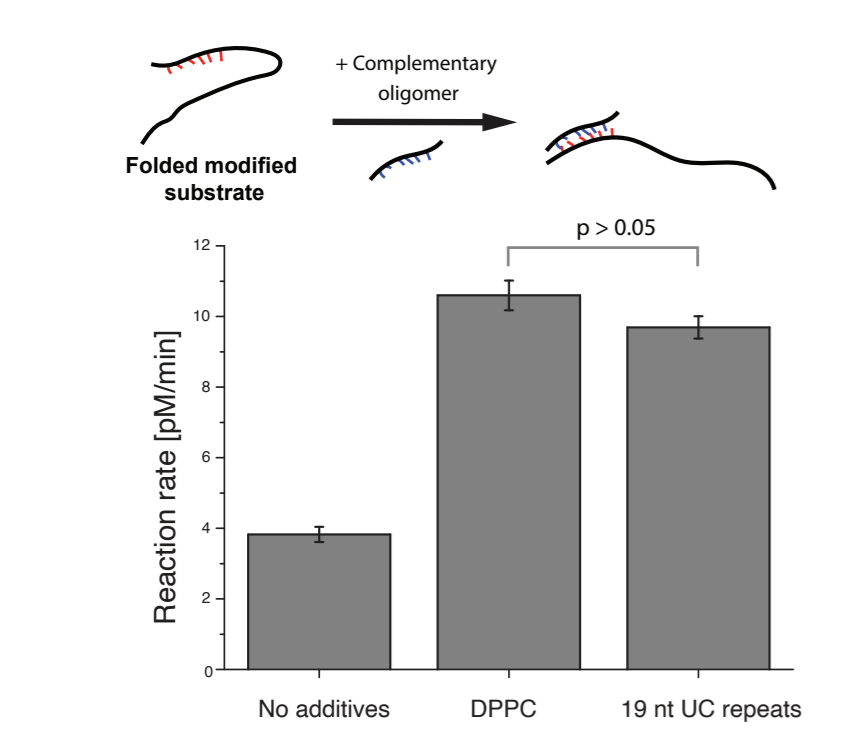

**f) Proposed mechanism for lipid-sensitive riboswitch-like behavior of the modified R3C substrates**

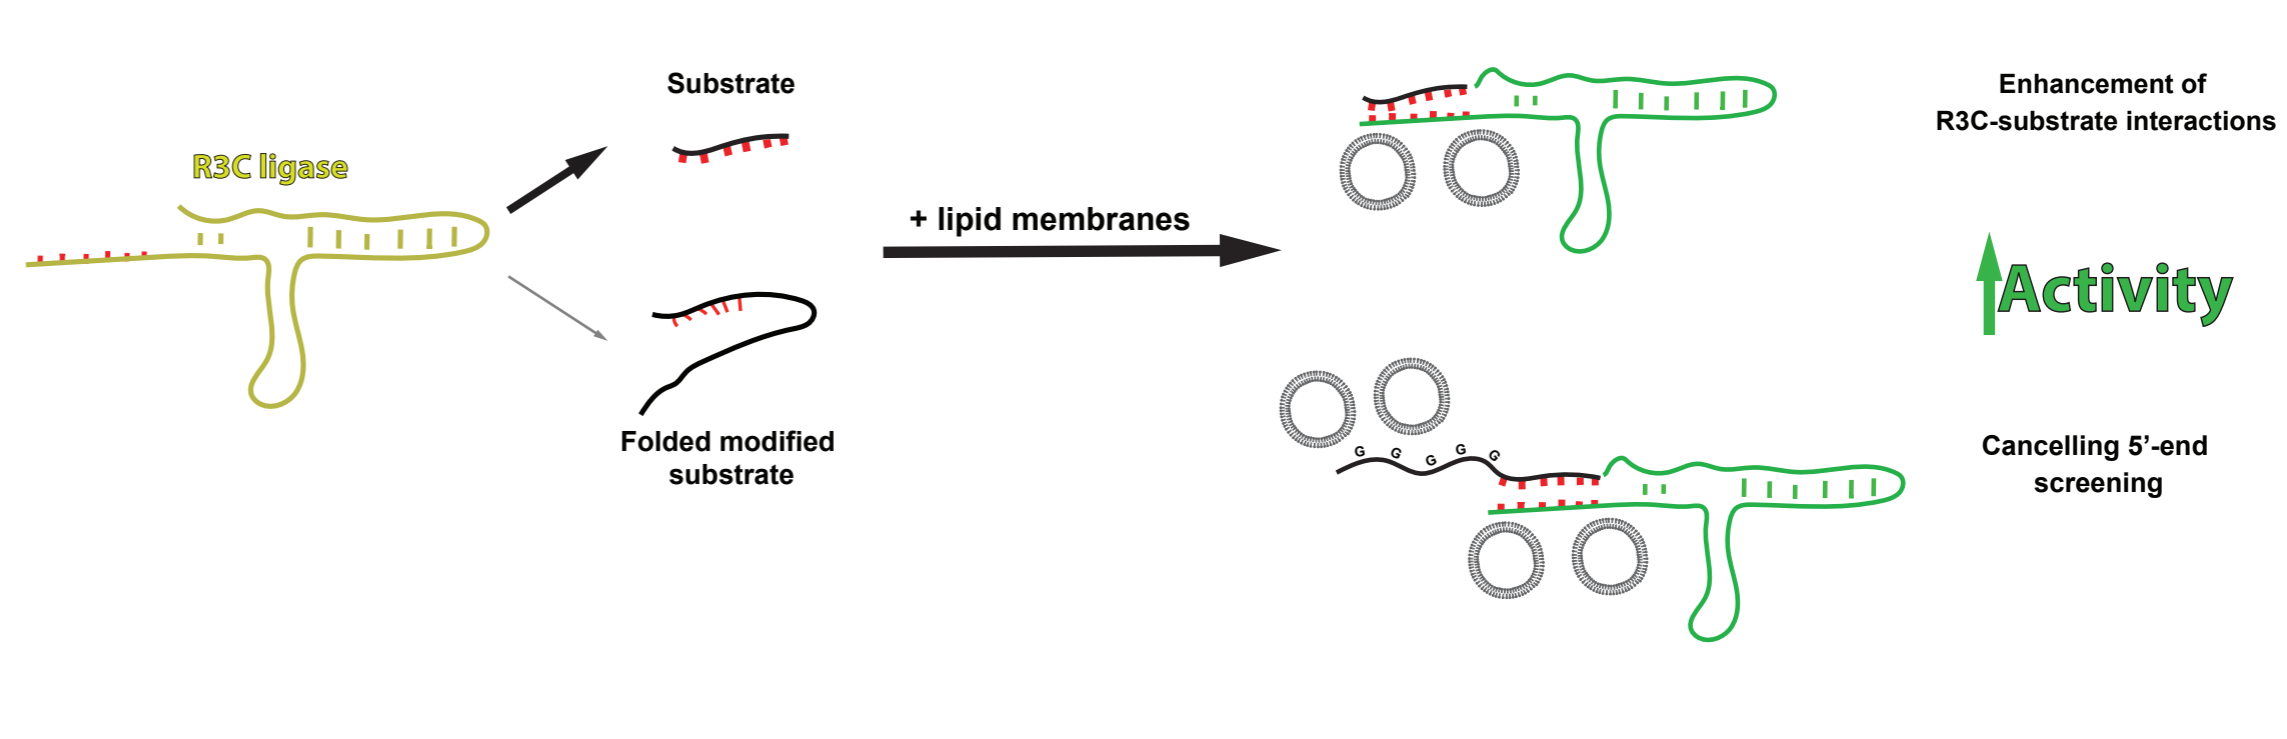

**Fig. 7 Modification of the R3C substrate sequences enables lipid-dependent tunability of ligation rate.** (a) Modified R3C reaction substrates were synthesized in order to increase binding to the membrane. The catalytic 3' end of the molecule was enriched with 5' tails with varying G content. Reactions for modified substrates showed lower reaction rate constants compared with the unmodified substrate. (b) The mechanism for inhibition of activity was evaluated by analysis of R3C reactants using native PAGE. The unmodified short substrate is entirely bound to the ligase, whereas AG-modified substrates do not bind entirely and show mobility abnormalities, which suggest substrate folding (magenta points). An AG-rich oligomer does not fold into multiple structures itself and does not comigrate with the ligase, indicating that folding of the substrates impairs substrate-ligase interactions. (c) Modification of the substrate sequence through addition of a 5' overhang increases binding to the membrane. (d) Addition of lipid membranes to reactions with the G-rich substrates increases reaction rates to the level of the unmodified substrate. (e) Addition of an oligomer with complementary sequence to the 5' end of 9x(AG) substrate overhang rescues R3C activity, comparable to the effect of gel membranes. (f) We propose that the decrease of R3C reaction rates in the presence of G-rich substrates is based on the inhibition of the catalytic part of the substrate by the 5' G-rich overhang. The presence of lipid membranes not only increases R3C-substrate interactions, but also screens the 5' G-rich substrate part enabling the R3C reaction to proceed.
